# Supplementary material for: Motivation, challenges and realities of volunteer community cardiac arrest response: a qualitative study of ‘lay’ community first responders
Source: PubMed Central journal article supplement — BMJ Open. 2019 Aug 8;9(8):e029015. doi: 10.1136/bmjopen-2019-029015 (PMC6701604; doi:10.1136/bmjopen-2019-029015), 2019-08-08
Supplement: bmjopen-2019-029015.draft_revisions.pdf [file bmjopen-2019-029015.draft_revisions.pdf]

# BMJ Open

BMJ Open is committed to open peer review. As part of this commitment we make the peer review history of every article we publish publicly available.

When an article is published we post the peer reviewers' comments and the authors' responses online. We also post the versions of the paper that were used during peer review. These are the versions that the peer review comments apply to.

The versions of the paper that follow are the versions that were submitted during the peer review process. They are not the versions of record or the final published versions. They should not be cited or distributed as the published version of this manuscript.

BMJ Open is an open access journal and the full, final, typeset and author-corrected version of record of the manuscript is available on our site with no access controls, subscription charges or pay-per-view fees (<http://bmjopen.bmj.com>).

If you have any questions on BMJ Open's open peer review process please email [info.bmjopen@bmj.com](mailto:info.bmjopen@bmj.com)

# BMJ Open

## Motivation, challenges and realities of volunteer community cardiac arrest response: A qualitative study of 'lay' community first responders

|                               |                                                                                                                                                                                               |
|-------------------------------|-----------------------------------------------------------------------------------------------------------------------------------------------------------------------------------------------|
| Journal:                      | <i>BMJ Open</i>                                                                                                                                                                               |
| Manuscript ID                 | bmjopen-2019-029015                                                                                                                                                                           |
| Article Type:                 | Research                                                                                                                                                                                      |
| Date Submitted by the Author: | 08-Jan-2019                                                                                                                                                                                   |
| Complete List of Authors:     | Barry, Tomás ; University College Dublin, School of Medicine; CEMS Guerin, Suzanne; University College Dublin, School of Psychology Bury, Gerard; University College Dublin, General Practice |
| Keywords:                     | ACCIDENT & EMERGENCY MEDICINE, EDUCATION & TRAINING (see Medical Education & Training), PUBLIC HEALTH                                                                                         |
|                               |                                                                                                                                                                                               |

SCHOLARONE™  
Manuscripts

1  
2  
3 **Motivation, challenges and realities of volunteer community cardiac arrest response: A qualitative**  
4 **study of 'lay' community first responders**  
5  
6  
7

8 **Tomas Barry<sup>1</sup>, Suzanne Guerin<sup>2</sup> & Gerard Bury<sup>1</sup>**  
9

- 10  
11  
12 1. UCD Centre for Emergency Medical Science, School of Medicine, Health Sciences  
13 Centre, University College Dublin, Belfield, Dublin 4, Ireland  
14  
15 2. School of Psychology, University College Dublin, Belfield, Dublin 4, Ireland  
16  
17  
18  
19  
20  
21  
22  
23

24 Send correspondence to:

25 Dr Tomás Barry,  
26 UCD Centre for Emergency Medical Science  
27 School of Medicine,  
28 Health Sciences Centre,  
29 University College Dublin,  
30 Belfield, Dublin 4, Ireland  
31  
32 Tel: +353 (0) 17166693  
33 Email: tomas.barry@ucd.ie  
34  
35  
36  
37  
38  
39  
40  
41  
42  
43  
44  
45  
46  
47  
48  
49  
50  
51  
52  
53  
54  
55  
56  
57  
58  
59  
60

1  
2  
3 **Motivation, challenges and realities of volunteer community cardiac arrest response: A qualitative**  
4 **study of 'lay' community first responders**  
5  
6  
7

8 **Abstract**  
9

10  
11  
12 Objectives

13 To explore the reasons why lay community first responders (CFRs) volunteer to participate in out-of-  
14 hospital cardiac arrest response and the realities of their experience in providing this service to the  
15 community.  
16

17  
18 Design

19 A qualitative study, utilising in-depth semi-structured interviews that were recorded and  
20 transcribed. Thematic analysis was undertaken and credibility checks conducted.  
21

22  
23 Setting

24 Nine geographically varied lay CFR schemes throughout the Republic of Ireland.  
25

26  
27 Participants

28 Twelve experienced community first responders.  
29

30  
31 Results

32 CFRs were motivated to participate based on a variety of factors. These included altruistic, social and  
33 pre-existing emergency care interest. A proportion of CFRs volunteered because of experience of  
34 cardiac arrest or illness in a relative. Sophisticated structures and complex care appear to underpin  
35 CFR involvement in out-of-hospital cardiac arrest. Strategic and organisational issues, multifaceted  
36 cardiac arrest care and the psychosocial impact of participation were considered.  
37  
38

39  
40 Conclusions

41 Health systems that facilitate CFR out-of-hospital cardiac arrest response should consider a variety of  
42 relevant issues including the suitability of those that volunteer, complexities of end-of-life care and  
43 responder psychological welfare in addition to CFRs core role of providing early basic life support and  
44 defibrillation in the community.  
45  
46  
47  
48  
49  
50  
51  
52  
53  
54  
55  
56  
57  
58  
59  
60

### Strengths and limitations of the study

- This is the first study to explore both the reasons CFRs volunteer to provide cardiac arrest response and the realities of CFRs experience in providing this care.
- As a qualitative study this research has facilitated the acquisition of novel data that generates important hypothesis with significant implications for systems that deploy community first responders to cardiac arrest.
- Further research is needed to explore whether the findings of this research apply more generally.

### Funding Source

This research was supported by an Irish College of General Practitioners research grant. The funder had no role in data collection, analysis or in the preparation of this manuscript.

### Competing Interests

TB & GB are general practitioners who participate voluntarily in OHCA community response and declare no other conflicts of interest

SG is an academic researcher with experience of health services research. She has no conflict of interest to declare

### Ethics and Patient Consent

Ethical approval was granted by the UCD Human Research Ethics committee Ref LS-17-42-Barry and participant informed consent was obtained prior to the commencement of data collection.

### Acknowledgements

The research team acknowledge the assistance of CFR Ireland and Dr David Menzies in planning and carrying out this research.

We would also like to specifically thank the CFRs who participated in the research.

### Author Contributions

TB conceived the study. TB SG & GB contributed to the design of the study. TB acquired the data. TB, SG & GB interpreted and analysed the data. TB drafted the manuscript which was critically revised

1  
2  
3 for important intellectual content by all authors, who approved the final version. TB is guarantor for  
4 the study.  
5  
6  
7

#### 8 **Data Sharing**

9  
10 No additional data available.  
11  
12

13  
14 **Word Count 3822**  
15  
16  
17  
18  
19  
20  
21  
22  
23  
24  
25  
26  
27  
28  
29  
30  
31  
32  
33  
34  
35  
36  
37  
38  
39  
40  
41  
42  
43  
44  
45  
46  
47  
48  
49  
50  
51  
52  
53  
54  
55  
56  
57  
58  
59  
60

For peer review only

## **Motivation, challenges and realities of volunteer community cardiac arrest response: A qualitative study of 'lay' community first responders**

### **Main Text**

#### **Introduction**

##### **Background**

Approximately 275,000 people are treated for out-of-hospital cardiac arrest (OHCA) in Europe annually but only one in ten survive<sup>1</sup>. Successful resuscitation is largely determined by the early availability of CPR and defibrillation within the community. The efficacy of these treatments is critically time sensitive<sup>2</sup>. Community first responders (CFRs) are volunteers who live or work within a community and are organised in a framework which offers OHCA care in that community to supplement the standard ambulance service response<sup>3</sup>. By virtue of their presence in the community, CFRs may reach patients earlier than the statutory ambulance service and thus shorten the collapse to CPR/defibrillation interval. International research has demonstrated that CFRs can play a significant role in early CPR, defibrillation and potentially OHCA survival<sup>4-7</sup>.

Ireland has a population of 4.7 million<sup>8</sup>. Approximately 2000 OHCA are dealt with by the Irish ambulance services annually; although survival is rising, it remains in the region of seven percent<sup>9</sup>. One third of Ireland's population live in rural areas<sup>9</sup>. Only nine percent of rural Irish OHCA patients receive a statutory ambulance response within the national target timeframe of eight minutes or less; ultimately rural OHCA patients are less likely to be discharged alive from hospital<sup>10</sup>. Given Ireland's settlement pattern, the deployment of CFRs to OHCA has been embraced as a key public health response to OHCA and CFR schemes have been developed both in urban and rural areas. In Ireland, CFRs are volunteers who are activated by text message alert from the statutory ambulance service. CFR categories include off duty ambulance service staff, fire service CFRs, family doctors and lay CFR groups<sup>11</sup>. This study focuses on lay CFR groups. Several dozen people may join any individual group. Although groups do not have professional medical responsibilities, off duty healthcare staff sometimes also join and contribute as volunteers. Accreditation occurs through the National Ambulance Service and CFRs 'go live' when training, equipment, activation and support structures are in place. Most lay CFR groups operate by having a roster of two-person teams who carry a dedicated alert phone, defibrillator and basic life support equipment to cover defined periods for their area. When an alert is received, the CFR(s) respond using normal driving rules.

##### **Importance**

1  
2  
3 Despite the observation that CFRs are established as a key element of OHCA response in Ireland and  
4 over 500 individual response schemes are now in place, virtually no data is available concerning CFR  
5 activities. Research in this area is urgently required.  
6

7 The involvement of lay CFRs in OHCA resuscitation is unique in terms of a healthcare systems response  
8 to a life threatening emergency situation. It is not without risk. It involves the deployment of  
9 volunteers with minimal training to the most high acuity medical situations in their own communities  
10 and has raised potential concerns in terms of professional gatekeeping, training and supervision<sup>5</sup>.  
11 Furthermore, with an incidence rate in Ireland of 50 per 100,000 population per year, OHCA is likely  
12 to be a rare event for individual CFR schemes especially in rural communities<sup>9</sup>. Ultimately the  
13 engagement of CFRs will need to be sustained over time. Despite the observation that CFR deployment  
14 has emerged as an increasingly common OHCA intervention internationally and is being embraced by  
15 various EMS systems, very little research has been carried out to explore the motivation, experience  
16 or perceptions of this key group of people.  
17  
18  
19

### 20 Goals of This Investigation

21  
22 The aim of this study is to explore the reasons why lay CFRs volunteer to participate in OHCA response  
23 and the realities of their experience in providing this service to the community.  
24  
25  
26

## 27 **Methods**

### 28 29 30 31 Study design and setting

32 A qualitative study, utilising in-depth semi-structured interviews followed by thematic analysis was  
33 undertaken. The study setting was geographically distributed lay CFR groups, both rural and urban  
34 throughout Ireland. The type of qualitative approach employed was phenomenological; the research  
35 process focused on understanding the participants view of self and their surrounding world in the  
36 specific context of OHCA response<sup>12</sup>. The methodological approach was informed by the standards for  
37 reporting of qualitative research outlined by O'Brien et al 2014<sup>13</sup> and the analytic approach outlined  
38 by Braun & Clarke 2008<sup>14</sup>. Steps to ensure credibility in the analysis process were also conducted and  
39 are described below. Ethical approval was granted by the UCD Human Research Ethics committee (Ref  
40 LS-17-42-Barry) and participant informed consent was obtained prior to the commencement of data  
41 collection. Neither patients nor members of the public were involved in the design of this study.  
42  
43  
44  
45  
46

### 47 Selection of Participants'

48  
49 A purposive approach to sampling was undertaken, with recruitment through Irelands dedicated CFR  
50 network (CFR Ireland). All CFRs dispatched by the ambulance service in Ireland have undergone at  
51 minimum, a specific half day training course in basic life support and AED use. In addition each  
52 participant was required to have personal experience of responding to cardiac arrest in the  
53 community. No specific incentive or reward for participation was offered beyond highlighting the  
54 value of contributing to increased understanding of this scientific field. A study information leaflet was  
55 provided to each participant prior to enrolment. In advance of the study we considered the potential  
56 that topics discussed might be distressing for participants and it was made clear that participants were  
57 free to pass on any topics they found uncomfortable. Provisions were made to refer participants to  
58 their own family doctor if distress was experienced from participation in the study.  
59  
60



## Data Collection

One researcher (TB) conducted all interviews, which were face to face and took place at various locations convenient for the relevant CFR(s). Interviews took place between September and December 2017. Prior to conducting interviews TB & SG (an experienced qualitative researcher) formally planned the interview process; potential biases were considered via a reflective process and a formal reflexivity statement was composed. The researcher (TB) aimed to identify any personal biases that might affect the research process or results.

*The observation that the researcher came from the 'world view perspective' of a doctor who himself participated in cardiac arrest response was considered in detail at this stage.*

A semi-structured interview format was undertaken to allow flexibility of response and follow up 'unplanned' questions to facilitate a participant led exploration of topics<sup>12</sup>. This approach involved a pre-prepared interview guide/schedule to facilitate overall structure but did not require rigid adherence to precise wording of questions or the order in which they were asked<sup>15</sup>. The written interview schedule considered two key domains; 1) the participant's motivation to participate in the scheme and 2) the realities of providing first response to cardiac arrest in the community. Each domain involved standard initial open ended 'prompt' questions and flexible 'follow on' questions based on the interviewees' initial responses. Informed written and verbal consent were obtained before commencing each interview. The initial interview acted as a pilot where the candidate was asked to give feedback and suggestions regarding the interview process. Immediately following each other interview reflections concerning interview process and content were recorded as field notes in a research diary. All interviews were recorded using a Zoom H2n professional grade recorder and later professionally transcribed. The transcripts were then checked against the tapes for accuracy and minor corrections were made as necessary.

## Data Analysis

Data was analysed using the thematic analysis framework outlined by Braun and Clarke<sup>14</sup>. Thematic analysis is a method for identifying, analysing and reporting themes within data. It involves six phases; 'Data familiarisation', 'Generating initial codes', 'Searching for themes', 'Reviewing themes', 'Defining and naming themes' and 'Producing a report'. Initial coding and all further phases were conducted using NVIVO 11 for Windows. An experienced qualitative researcher (SG) acted as co-researcher at all stages of the analytic process to ensure credibility. SG coded a sample of the dataset (one interview) independently and reviewed all candidate and final worked out themes with TB thus supporting a reflexive process throughout the data analysis. The analysis produced a structure of themes in relation to key domains that reflect the focus of the study.

## Results

### Characteristics of the study subjects

CFR Ireland contacted fifteen geographically disparate CFR groups on behalf of the research team and reported that these fifteen groups were selected in a 'random' fashion. Where a group expressed interest, permission was obtained for the research team to contact a nominated person from that relevant group directly. Twelve groups offered permission, two of whom were identified as new

1  
2  
3 groups unlikely to have yet participated in a cardiac arrest response and thus were excluded from the  
4 study.  
5

6 Ultimately nine of the remaining ten groups participated in the research. Twelve CFRs of varying ages  
7 and representing those nine geographically distributed lay CFR groups self-selected to participate.  
8 Given the sensitivity of the topic area detailed demographic participant elements were not profiled  
9 quantitatively, however all participants described extensive experience of OHCA response over a  
10 number of years. A total of ten in-depth interviews were conducted; on two occasions, two CFRs  
11 representing a single CFR group chose to be interviewed together. Two further participants  
12 interviewed were from one individual CFR group. All interviews were included in data analysis. Gender  
13 was equally distributed among participants. Most participants occupied a senior role (for example  
14 scheme coordinator) within their respective CFR group. Two participants had a professional  
15 healthcare background. Interview duration ranged from 45 to 108 minutes, median duration was 58  
16 minutes. No participants elected to 'pass' on any topics raised in the interviews and no psychosocial  
17 distress was reported related to participating in the study.  
18  
19  
20  
21  
22

## 23 Main Results

### 24 25 26 27 28 29 Domain (1): Motivation to participate

30  
31 The results of thematic analysis considering the domain of 'motivation to participate' are reported in  
32 Table 1. CFRs can be motivated to volunteer by an interest in emergency care. Some CFRs may work  
33 as healthcare professionals although this can be challenging as the extra burden of knowledge might  
34 distract from the core basic life support tasks of a CFR. CFRs can also be motivated to participate based  
35 on a desire to give back to the community or as a means of social engagement. The inherent  
36 satisfaction in 'saving a life' was also highlighted. A proportion of CFRs can be motivated to volunteer  
37 based on past experience of OHCA incidents. For some, this is a response to having felt unprepared  
38 and unskilled in such a situation. For others the desire to volunteer can relate to a family experience  
39 of illness or OHCA. Although many such volunteers might cope well psychologically with the CFR role,  
40 respondents noted that for some individuals engaging in CFR activities was known to have caused  
41 psychological distress. A minority population of those that volunteer appear to be motivated by the  
42 dramatic elements of emergency care. One participant termed this group 'Blue Light Junkies'. Most  
43 participants appeared to have an awareness of this volunteer type and some considered their  
44 attributes to be incompatible with the calm affect and strong interpersonal skills considered necessary  
45 for the CFR role.  
46  
47  
48  
49  
50  
51  
52  
53  
54  
55  
56  
57  
58  
59  
60

Table 1: Motivation to participate, Key Themes

| Theme                               | Theme Description                                                                                                                                                                                                                                      | Illustrative Quote(s)                                                                                                                                                                                                                                                                                                                                                                                                                                                                                                                                                                              |
|-------------------------------------|--------------------------------------------------------------------------------------------------------------------------------------------------------------------------------------------------------------------------------------------------------|----------------------------------------------------------------------------------------------------------------------------------------------------------------------------------------------------------------------------------------------------------------------------------------------------------------------------------------------------------------------------------------------------------------------------------------------------------------------------------------------------------------------------------------------------------------------------------------------------|
| Existing skills and interest        | Volunteer CFRs may already have an interest in emergency care, be healthcare professionals or come with first aid training. CFR activity might also be a means by which a lay person with an interest in healthcare can pursue this interest.          | CFR10: <i>What we found is, it tends to be people who have some sort of a first aid background already that do it. So a lot of the people that joined us initially would have been the first aider in their rugby club, or the first aider in work, or something like that</i>                                                                                                                                                                                                                                                                                                                     |
| Giving back to the community        | CFR is seen as a means of doing something good for and giving back to the 'community', thus resulting in personal satisfaction.                                                                                                                        | CFR9: <i>Like that you're there, you're involved, giving something back, but it's for free, it's voluntary. It's brilliant, you know</i>                                                                                                                                                                                                                                                                                                                                                                                                                                                           |
| Getting involved with the community | Participation in CFR can be a means of engaging with the community and making social contacts.                                                                                                                                                         | CFR6: <i>I could never give back what I got out of the scheme, could never, after 12 years. I could never repay what I've got. I've met some of the...some of my closest friends now, through the scheme</i>                                                                                                                                                                                                                                                                                                                                                                                       |
| Saving a life                       | Participation in CFR offers the potential to 'save a life'. This has inherent personal satisfaction.                                                                                                                                                   | CFR9: <i>But for like the good ones where it's an arrest you get there, you shock them, they're back and discharged back home. Like there's no better feeling than actually being involved with that</i>                                                                                                                                                                                                                                                                                                                                                                                           |
| Personal experience of OHCA         | Personal experience of OHCA can be a potential motivator. This can involve a situation where a volunteer has encountered OHCA and felt helpless/was left with a feeling of needing to act on this. It can also involve family members of OHCA victims. | CFR8: <i>Well for me personally it was an incident I witnessed in a shopping centre... So unfortunately for the man, I suppose for everyone involved, the man died and passed away and I felt very helpless and I kept saying 'God this is tragic, because nobody knew what to do. We just stood around.' And I said 'Look, I hope I'll never feel like this again. I'm going to learn.'</i><br>CFR1: <i>A cohort have family issues, as in, something happened, or they have a child who maybe has cardiac problems, etcetera. That, I might come back to that later, that can be challenging</i> |
| 'Blue Light Junkies'                | A minority of individuals are motivated to participate based on a desire to engage with elements of OHCA response that are perceived as exciting or dramatic.                                                                                          | CFR2: <i>Yeah, I think some people probably have the, what do we refer to it is. I can't think actually the name we use, but basically they want to be Superman and they want to rush in and save people's lives and they're only dying to paint 'battenbergs' on the side of their cars and get blue lights – which obviously you're not allowed to do – but there is that element, that some of the people in the room, it's a real gung-ho macho kind of a thing</i>                                                                                                                            |

### Domain (2): The realities of providing first response to cardiac arrest in the community

A thematic map considering the domain of 'the realities of providing first response to cardiac arrest in the community' is shown in figure 1. A unifying overall umbrella theme was evident reflecting the observation that the systems underpinning CFR care are sophisticated and the care provided is complex. Three key follow-on themes were evident: 'essential strategic and organisational issues', 'the CFR role in OHCA is multifaceted' and the 'psychosocial impact of participating in CFR'. A number of follow on sub-themes were also apparent and are described below.

Fig 1: Thematic Map - Realities of providing first response to cardiac arrest in the community.

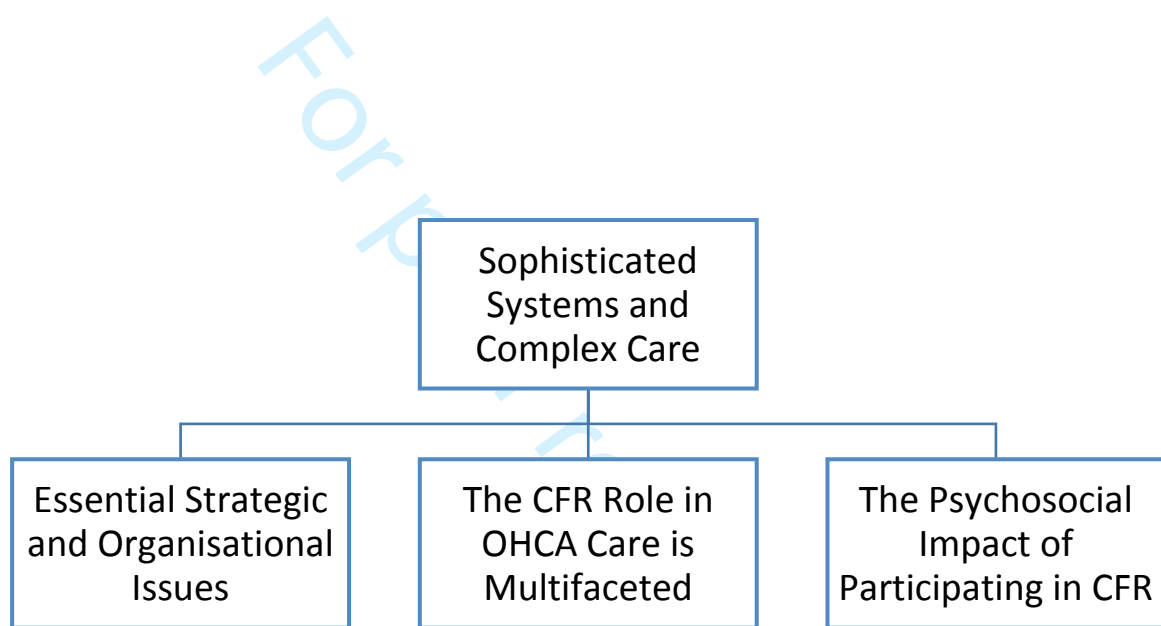

The first key theme 'essential strategic and organisational issues' is reported in table 2, with sub-themes identified by respondents. Participants highlighted the importance of community engagement, fundraising and cascading basic life support to the community. There was recognition that although not everyone may be suitable for the CFR role there are various other 'support' roles available to those wishing to volunteer. There was evidence that CFR groups had developed processes of screening and supported induction for new members. The voluntary/ community nature of the scheme could pose challenges in terms of group dynamics and conflict. The importance of training for the role of CFR was highlighted. Anxieties in terms of locating patients in OHCA quickly were discussed as was the value of smartphone mapping and 'eircodes' (postcodes) in expediting this process. Safe driving was an evident priority. There were conflicting perspectives on CFR scope of practice. In general, CFR interactions with ambulance services management were considered positive however there was some frustration around a lack of financial support, and a perceived high level of caution on the part of health services management around CFR activities.

Table 2. Key theme 'Essential strategic and organisational issues' with sub-themes

| Sub-Theme                                                          | Sub-Theme Description                                                                                                                                                                                                                           | Illustrative Quote(s)                                                                                                                                                                                                                                                                                                                                                                                                                                                                                                                                                                                                                                                                                                                                                                                                                 |
|--------------------------------------------------------------------|-------------------------------------------------------------------------------------------------------------------------------------------------------------------------------------------------------------------------------------------------|---------------------------------------------------------------------------------------------------------------------------------------------------------------------------------------------------------------------------------------------------------------------------------------------------------------------------------------------------------------------------------------------------------------------------------------------------------------------------------------------------------------------------------------------------------------------------------------------------------------------------------------------------------------------------------------------------------------------------------------------------------------------------------------------------------------------------------------|
| Community engagement                                               | Community engagement is important for recruitment, fundraising and cascading basic life support skills/AEDs to the community.                                                                                                                   | CFR5: <i>When we're training we actually go out into the community like. Housing estates, the kids are fantastic, once they see something different going on they are like that. The word spreads so then we have a crowd. So, yes, so it is basically from being out around in the community doing different demonstrations, fundraising, all that kind of stuff</i>                                                                                                                                                                                                                                                                                                                                                                                                                                                                 |
| Recruitment, screening and potential for different volunteer roles | Ongoing recruitment is important. Screening is important as not everyone is suitable for the CFR role but it is also not possible to exclude individuals as a community organisation. A variety of additional roles outside of responder exist. | CFR1: <i>We have had a couple of situations where (people) appear to have come and done the training to get it on their CV, and then never shown up again. The other piece is, it's very much, we do need to see whether they are 'a fit' in terms of going into somebody's house in a very sensitive situation, we need to work out, A, have they got the skills, and B, have they got... more the people skills and the appropriateness skills. So we don't rush them in</i><br>CFR2: <i>I mean most of the people are very competent but there are people there that I just wouldn't be 100% sure of. But unfortunately, in a community group, you know, unless I think somebody is actually dangerous, we're not in a position to tell them to go away.</i>                                                                       |
| Supporting new members                                             | Supported induction is important.                                                                                                                                                                                                               | CFR3: <i>When anyone (is) first kind of qualified they're told you can only go if responder A is on and you're responder B and only if they're going because it's not good for you to be going on your own for the first few calls.</i>                                                                                                                                                                                                                                                                                                                                                                                                                                                                                                                                                                                               |
| Training                                                           | Ongoing training is important.                                                                                                                                                                                                                  | CFR4: <i>We train twice a month now, you know. And we change all the scenarios and that we sit down and have discussions about - as to how did our last call go? Is there something else that maybe you should have done when you think back on it? Or what difficulties did you have on that call?</i>                                                                                                                                                                                                                                                                                                                                                                                                                                                                                                                               |
| Dispatch                                                           | Time pressures exist in locating the patient in OHCA. Potential technological solutions such as smart phone mapping are used. Safe driving is a priority.                                                                                       | CFR1: <i>I think the anxiety about getting there. I suppose the biggest anxiety for the volunteers is, will I be able to find the house. That is the thing that keeps them awake at night.</i><br>CFR10: <i>Google Maps is the answer to pretty much everything</i><br>CFR3: <i>So you have to remain calm, you have to abide by the rules of the road, obviously, and that can be a bit stressful if you hit traffic but you just have to. You just have to say to yourself I'm just doing my best and the ambulance is on its way anyways</i>                                                                                                                                                                                                                                                                                       |
| Group dynamics and conflict                                        | The voluntary nature of community groups can be a challenge in terms of group conflict and cohesion.                                                                                                                                            | CFR3: <i>And, as with all volunteer groups, there will be issues thrown up. I know one person did leave because she didn't feel welcomed or something, now I think that was probably on her side a bit. So there's going to be issues like that with any group of volunteers</i>                                                                                                                                                                                                                                                                                                                                                                                                                                                                                                                                                      |
| Scope of practice                                                  | Conflicting opinions exist re the CFR scope of practice; some believe 'best to stick to the basics' while others want to do more.                                                                                                               | CFR12: <i>I keep saying to my guys, our guys, 'Get this right first and then we might give a look at something else', ... but definitely I wouldn't be that keen to broaden the range. I don't see our guys really behaving themselves and concentrating on their skill level</i><br>CFR4: <i>We've a paramedic on board but we're not allowed to use oxygen. There's loads of things that we can't do that we're trained in doing, you know. Then there's new drugs coming in that, has got the licence to you know certify us in administering these drugs and that and we're not even allowed to use this.</i>                                                                                                                                                                                                                     |
| Support & friction at the health service interface                 | Key health services individuals and structures support CFR however limited financial support is available. At times some frustration with what is perceived as an overly cautious health services approach is evident.                          | CFR1: <i>So ('X') is the CFR coordinator when there was nobody doing anything, and they have been brilliant. So we had to work it all out, the policies weren't in place at the time, they're... now the policy is excellent. Whoever wrote it, seemed to cover every base, and I know it's being updated currently.</i><br>CFR12: <i>It's not easy sometimes dealing with the HSE. They wouldn't be too quick to change or make up their minds about stuff. Or at the same time we'd be looking at well our neighbours are dying, and you can't make your mind up, so we figure stuff out. They're very fearful that there's information out there but it's out there anyway, so I think they're fearful of making a mistake. I think for me looking at it from a non-HSE employee, they'd rather do nothing than make a mistake</i> |

The second parent theme 'the CFR role in OHCA care is multifaceted' is reported in table 3. A variety of CFR roles in OHCA care were highlighted ranging from providing early BLS care in advance of the ambulance service, assisting the ambulance service on their arrival and the provision of psychosocial support for families. As the 'first responders' to OHCA, CFRs had the potential to encounter challenging situations around end of life care. Difficulties around 'do not resuscitate' directives and conflicting family perspectives on the appropriateness of resuscitation were discussed. CFRs strongly valued being involved in the care process by paramedics. A minority of paramedics were perceived as having negative attitudes toward CFRs possibly because of a perspective that CFRs were undermining the paramedic role by providing a low cost alternative. The provision of psychosocial support to families was perceived as routine, important and in fact a significant overall proportion of the care CFRs provided in OHCA.

Table 3. 'The CFR role in OHCA care is multifaceted'

| Sub-Theme                 | Sub-Theme Description                                                                                                                                                                                                                 | Illustrative Quote(s)                                                                                                                                                                                                                                                                                                                                                                                                                                                                                                                                                                                       |
|---------------------------|---------------------------------------------------------------------------------------------------------------------------------------------------------------------------------------------------------------------------------------|-------------------------------------------------------------------------------------------------------------------------------------------------------------------------------------------------------------------------------------------------------------------------------------------------------------------------------------------------------------------------------------------------------------------------------------------------------------------------------------------------------------------------------------------------------------------------------------------------------------|
| Providing early BLS       | The provision of early BLS is of fundamental importance. Complex end of life situations can be encountered but the BLS element of care is straightforward.                                                                            | <i>CFR6: Look it, although it's stressful and it's very difficult, the calls you will go on will be very difficult, but what we have to do is very simple, it's very straightforward - CPR and use a defibrillator, nothing else matters</i>                                                                                                                                                                                                                                                                                                                                                                |
| Dilemmas                  | As 'first to respond' CFRs can encounter situations where difficult decisions have to be made in terms of what actions are appropriate.                                                                                               | <i>CFR2: We'd one person in particular whose family absolutely wanted CPR done and the nurse was saying look, he's not well... and they insisted, so we did it but ...It raises big moral issues for me</i>                                                                                                                                                                                                                                                                                                                                                                                                 |
| Assisting ambulance staff | CFRs are happy to assist ambulance staff as necessary and appreciate when paramedics involve them in the care process. Relationships with paramedics are mostly positive but a minority of paramedics appear to view CFRs negatively. | <i>CFR11: I have gone in the back of the ambulance doing the breaths the whole way to the hospital, it was brilliant, absolutely brilliant but for the lads to let me do that, you know?</i><br><i>CFR3: And we get quite a few who are quite rude and not happy to see us there, I'll be honest. But I would say it's actually only 5% but you're so almost offended by them...I would say if you were starting out as a first responder on your first few calls and you came across some of the guys that we've come across, you might be thinking, you know, what's the point in me coming out here.</i> |
| Caring for families       | Providing psychosocial support to patients families is a definite and significant component of the care CFRs provide. Providing this aspect of care is satisfying for CFRs.                                                           | <i>CFR2: Their loved one has just died and they're there on their own, you know. So, it is very much a social, there's a huge social care element to it and it's something I constantly emphasise to people when they're talking about joining is that the saving a life bit will happen once in a blue moon. That really what this is about is being there, that we are there with the people as opposed to them being scared and in pain and on their own.</i>                                                                                                                                            |

The final key theme 'the psychosocial impact of participating in CFR' is reported in table 4. Participating in CFR had the potential to affect volunteers in a number of ways. For some the burden of being "on call" had been a challenge in terms of a sense of hyperarousal in anticipation of an alert. Participation in CFR could at times result in exposure to emotionally traumatic situations and there was evidence that such situations had affected CFRs in their aftermath. For some, the interaction with family members at an OHCA event had resulted in changed relationships and social avoidance going forward. CFR wellbeing was a key issue for participants, who expressed a sense of personal responsibility for

1  
2  
3 this element of participation. Internal debrief in the immediate aftermath of an incident was  
4 frequently employed as a coping strategy. Formal CFR supports such as critical incident stress  
5 management (CISM) were evident and highly valued by participants.  
6  
7  
8  
9  
10  
11  
12  
13  
14  
15  
16  
17  
18  
19

20 **Table 4. 'The psychosocial impact of participating in CFR'**

| Sub-Theme                                | Sub-Theme Description                                                                                                                                           | Illustrative Quote(s)                                                                                                                                                                                                                                                                                                                                                                                                                                                                                                                                                                                                                        |
|------------------------------------------|-----------------------------------------------------------------------------------------------------------------------------------------------------------------|----------------------------------------------------------------------------------------------------------------------------------------------------------------------------------------------------------------------------------------------------------------------------------------------------------------------------------------------------------------------------------------------------------------------------------------------------------------------------------------------------------------------------------------------------------------------------------------------------------------------------------------------|
| The burden of being 'on-call'            | Being 'on call' is burdensome for a proportion of CFRs. CFRs can perceive a duty to provide cover and a sense of guilt when unable to respond.                  | <p>CFR: He had said he was just finding it more and more and more playing on his mind. The phone, not calls that he was on, he was just more conscious that he was on call. So if he couldn't take it at night, because he was waiting for it to ring</p> <p>CFR8: I found it a little bit of a burden at times, in that, but I was trying to cover too much and then I realised you just can't slot into every vacant slot</p>                                                                                                                                                                                                              |
| Difficult and distressing situations     | CFRs are exposed to difficult situations that can have significant psychological effects in the aftermath.                                                      | <p>CFR10: It was a horrible experience, in terms of, you could hear screaming as you were approaching the driveway... it was like walking into a little horror film.</p> <p>CFR12: And it was just dreadful what she had to endure and she happened to be on her own, she was the first on the scene. She happened to be on her own, but for me I probably wouldn't have gone in but she did. Fair play to her she went in and ...they were in bits. There was sadness, there was anger, there was fighting, there was everything. Everything thrown at her. Dreadful and it took a long time to get over it and she is still responding</p> |
| Changed relationships with the community | Providing CFR care can result in changed relationships with members of the community.                                                                           | <p>CFR7: People do actually avoid you. And when it was actually said to me, they're not actually avoiding you, they're avoiding the flashbacks because when they, the last time they seen you. It brings back the memories of the last time. Well hang on, the last time I seen "X" he was on top of my mother pumping on her chest and blowing into her mouth. And all the flashbacks come back</p>                                                                                                                                                                                                                                         |
| Volunteer wellbeing and supports         | CFR wellbeing is a priority for CFR groups. Debrief and formal health services support in the form of CISM (critical incident stress management) are important. | <p>CFR4: It's very important when you stay in contact with all your members and find out their welfare. Because as a coordinator within a unit, it's your responsibility to make sure that all your members are safe, you know.</p> <p>CFR5: We have had some bad callouts but like I said we go back to the house and put the kettle on and we just go through the whole scene and just make sure everyone is alright, how are they feeling, you know</p> <p>CFR1: The CISM training is very good, it's the awareness piece. And I have to say that CISM sessions at the CFR conferences have been excellent</p>                            |

## 21 22 23 24 25 26 27 28 29 30 31 32 33 34 35 36 37 38 39 40 41 42 43 44 45 46 47 48 49 50 51 52 53 54 55 56 Discussion

57 The deployment of lay CFRs to OHCA represents a key mechanism by which early CPR and defibrillation  
58 can be made available in the community, which in the context of the current evidence base  
59 surrounding OHCA resuscitation is the priority<sup>16</sup>. Where CFRs can reach OHCA patients quickly,  
60

1  
2  
3 increased rates of survival can be achieved<sup>17</sup>. It is thus unsurprising that the narrative of CFR care has  
4 to date focused on the provision of early CPR and defibrillation. However, this study shows that CFR  
5 care has evolved to be a sophisticated entity that includes complex decision making, a significant  
6 component dedicated to the provision of psychosocial support for bystanders and family members  
7 and also teamwork with ambulance service staff during ongoing resuscitation. It is striking that  
8 participants raised complex moral and psychological sub-themes as well as the ongoing welfare both  
9 of CFR volunteers and the families of OHCA patients in their communities. These issues highlight the  
10 need for a broad preparation and longer-term support for the CFR role. A focus on CPR skills and  
11 driving safety may have been perceived as the critical components of the role in the past but the  
12 material gleaned in this study show that those who arrive first at the scene of an OHCA can be  
13 confronted with the need to make complex decisions immediately and under pressure. Preparation  
14 for that decision making process and support in dealing with its consequences are familiar themes in  
15 professional advanced life-support resuscitation training – this study highlights their relevance for CFR  
16 volunteers also. When lay volunteers arrive at a home in which family members are conflicted about  
17 providing resuscitation to a loved one, immediate practical, moral and personal challenges arise, few  
18 of which have procedures-driven responses. The personal qualities and preparation of the CFR  
19 volunteers are the attributes which come into play in such scenarios according to study respondents.  
20 Those attributes may need to be more strongly ‘screened for’ and supported among volunteers.  
21  
22  
23  
24

25 Complexity emerges from this study as a significant finding. While CPR and defibrillation are noted by  
26 respondents to be straightforward skills, the personal and systems issues associated with the role are  
27 highly complex; respondents identify many issues which may be familiar within medical, nursing and  
28 paramedic training but which have received limited attention within ‘volunteer’ roles. In further  
29 developing the number and perhaps scope of new CFR schemes, the accreditation and support  
30 agencies should consider how best to address these demands.  
31  
32

33 Many of the factors that motivated CFRs in our study (prior relevant experience, a sense of altruism  
34 and the desire to engage with and make a contribution to the community) have been described  
35 previously<sup>18-21</sup>. The issue of close personal experience of OHCA or illness in a family member as a  
36 motivator is worthy of consideration, given the possibility of associated psychological distress.  
37 Sustained CFR participation may be related to the nature of CFR interaction with paramedics.  
38 Strategies that promote positive interactions (such as involving CFRs in the care process as appropriate  
39 and educating paramedics as to the role of CFRs) could be employed by ambulance services as a  
40 mechanism to formerly support CFR retention. The volunteer phenotype described by one participant  
41 as ‘blue light junkies’ has not to our knowledge been previously described in the CFR literature.  
42 Participants expressed conflicting views as to whether such individuals possessed the necessary  
43 attributes for competent CFR care. The issue of ‘problematic individuals’ highlights an entity unique  
44 to voluntary and community organisations providing healthcare services. In contrast, professional  
45 services have a mandate and mechanism to exclude individuals considered unsuitable for the role.  
46  
47  
48  
49

50 Concerns as to the psychological impact of participation in CFR have been highlighted in the  
51 literature<sup>18 19 22</sup>. Previous studies have however suggested that the incidence of significant prolonged  
52 adverse effects are likely to be low<sup>23 24</sup>. Participants in our study highlighted the psychologically  
53 challenging situations faced by CFRs and the importance of CFR wellbeing. This issue was actively  
54 managed by processes of volunteer screening, training, supported induction, debrief and CISM. CFRs  
55 who continue in the role may do so as a direct result of such mechanisms. Such individuals may also  
56 exhibit a resilience phenomenon<sup>21</sup>. It is however also possible that those who discontinue  
57 participation have suffered psychological ill effects. In evaluating the potential adverse effects of  
58 dispatching CFRs to OHCA such a population are likely to be of critical relevance but difficult to follow.  
59  
60



## Limitations

Our study has important limitations that should be considered when interpreting its results. The number of participants interviewed balanced the requirement for rich data acquisition with the pragmatic issue of conducting multiple in-depth face to face interviews at varied geographical locations. We adopted the approach to sampling advocated by Braun and Clarke who do not suggest the application of the principle of 'data saturation' in sample size calculation but instead highlight the exploratory and interpretative ethos of thematic analysis and the requirement to offer a compelling and coherent analysis of the data by doing justice to its complexity and the nuance contained within it<sup>14 15 25</sup>. Ultimately our analysis produced an evolved structure of themes in relation to key domains that reflect the focus of the study and its research questions. Rich data was acquired from twelve participants that generated novel findings and important hypothesis with significant potential implications for all health systems that dispatch CFRs to OHCA. Further research is ultimately needed to explore whether these findings apply generally. Quantitative national and international surveys of CFRs should now be considered. Although the semi-structured interview is a flexible and adaptable way of generating findings, the lack of standardisation can raise concerns about reliability and biases are ultimately difficult to rule out<sup>12</sup>. The fact that participants were recruited via CFR Ireland and self-selected to participate could result in selection bias. This strategy did however provide a sample of experienced CFRs, many of whom had strategic roles within their organisations and ultimately facilitated significant depth of topic exploration and the development of evolved themes at data analysis. One participant was known to the interviewer prior to the research thus potentially introducing bias in the topics discussed. The participant in question was however recruited via the standard process via CFR Ireland and in their capacity as lay CFR.

Two healthcare professionals participated in this research. Both were recruited via the mechanisms already described and in their capacity as lay CFR rather than healthcare professional. Their healthcare professional perspectives may have introduced bias however it is also possible that their inclusion reflects a phenomenon where healthcare professionals participate in varied capacities in lay CFR schemes. This interface of health professional and lay CFR was not explored in detail in this study and may warrant further consideration. It may have specific relevance in light of the complexity of the CFR role and formalising appropriate supports for CFRs in managing challenging clinical circumstances with psychosocial impacts. Thematic analysis was selected as the methodological approach for this study based on its accessibility as a qualitative research approach and its flexibility in terms of theoretical framework<sup>15</sup>. Such flexibility was considered necessary in order to facilitate a bottom up inductive analysis of the participant data, in the context of a researcher who possessed an inherent disciplinary and 'insider' standpoint. It is possible that this perspective may have influenced the analysis. Ultimately an ongoing reflexive process adopted and operationalised throughout this research project aimed to limit such biases in so far as were possible. Other steps taken to mitigate potential bias included the use of published guidelines in the development and implementation of the research, acknowledgement of the positive role of the researcher's own experience of the topic and the collaboration with an experienced qualitative researcher throughout the research process.

## Conclusion

1  
2  
3 In summary, our results suggest that the structures that underpin CFR are sophisticated and the care  
4 provided is complex. This is a striking finding in the context of a voluntary and community enterprise.  
5 We offer figure 1 and its relevant sub-themes as one potential model for lay CFR care in the  
6 community. This will need to be considered and further developed by all stakeholders. Recent  
7 technological advances can facilitate markedly increased lay CFR recruitment and efficient  
8 'crowdsourcing' mechanisms of mobilising CFRs to OHCA<sup>26 27</sup>. Systems that employ such technological  
9 efficiencies may also need to consider the complex CFR issues around suitability of volunteers, end of  
10 life care and responder psychological welfare.  
11  
12  
13  
14  
15  
16  
17  
18  
19  
20

## 21 References

- 22 1. Atwood C, Eisenberg MS, Herlitz J, et al. Incidence of EMS-treated out-of-hospital cardiac arrest in  
23 Europe. *Resuscitation* 2005;**67**(1):75-80.
- 24 2. Valenzuela TD, Roe DJ, Cretin S, et al. Estimating effectiveness of cardiac arrest interventions: A  
25 logistic regression survival model. *Circulation* 1997;**96**(10):3308-13.
- 26 3. Barry T, Conroy N, Masterson S, et al. Community first responders for out-of-hospital cardiac  
27 arrest (Protocol). *Cochrane Database of Systematic Reviews* 2017, Issue 8. Art. No.:  
28 CD012764. DOI: 10.1002/14651858.CD012764.
- 29 4. Hansen CM, Kragholm K, Granger CB, et al. The role of bystanders, first responders, and  
30 emergency medical service providers in timely defibrillation and related outcomes after out-  
31 of-hospital cardiac arrest: Results from a statewide registry. *Resuscitation* 2015;**96**:303-09.
- 32 5. Smith LM, Davidson PM, Halcomb EJ, et al. Can lay responder defibrillation programmes improve  
33 survival to hospital discharge following an out-of-hospital cardiac arrest? *Aust Crit Care*  
34 2007;**20**(4):137-45.
- 35 6. Ringh M, Rosenqvist M, Hollenberg J, et al. Mobile-phone dispatch of laypersons for CPR in out-of-  
36 hospital cardiac arrest. *Resuscitation* 2015;**96**:2.
- 37 7. Zijlstra JA, Stieglis R, Riedijk F, et al. Local lay rescuers with AEDs, alerted by text messages,  
38 contribute to early defibrillation in a Dutch out-of-hospital cardiac arrest dispatch system.  
39 *Resuscitation* 2014;**85**(11):1444-49.
- 40 8. CSO. Census 2016 Summary Results - Part 1. Dublin: Central Statistics Office, 2017.
- 41 9. OHCAR. Out of Hospital Cardiac Arrest Register, Annual Report 2016. Galway, 2017.
- 42 10. Masterson S, Wright P, O'Donnell C, et al. Urban and rural differences in out-of-hospital cardiac  
43 arrest in Ireland. *Resuscitation* 2015;**91**:42-47.
- 44 11. Barry T, González A, Conroy N, et al Mapping the potential of community first responders to  
45 increase cardiac arrest survival *Open Heart* 2018;**5**:e000912. doi: 10.1136/openhrt-2018-  
46 000912.
- 47 12. Robson C. *Real world research: a resource for users of social research methods in applied*  
48 *settings*. 3rd ed. Oxford: Wiley-Blackwell, 2011.
- 49 13. O'Brien BC, Harris IB, Beckman TJ, et al. Standards for Reporting Qualitative Research: A  
50 Synthesis of Recommendations. *Acad Med* 2014;**89**(9):1245-51.
- 51 14. Braun V, Clarke V. Using thematic analysis in psychology. *Qualitative Research in Psychology*  
52 2006;**3**(2):77-101.
- 53 15. Braun V, Clarke V. *Successful qualitative research: a practical guide for beginners*. London: SAGE,  
54 2013.
- 55  
56  
57  
58  
59  
60

- 1
  - 2
  - 3
  - 4
  - 5
  - 6
  - 7
  - 8
  - 9
  - 10
  - 11
  - 12
  - 13
  - 14
  - 15
  - 16
  - 17
  - 18
  - 19
  - 20
  - 21
  - 22
  - 23
  - 24
  - 25
  - 26
  - 27
  - 28
  - 29
  - 30
  - 31
  - 32
  - 33
  - 34
  - 35
  - 36
  - 37
  - 38
  - 39
  - 40
  - 41
  - 42
  - 43
  - 44
  - 45
  - 46
  - 47
  - 48
  - 49
  - 50
  - 51
  - 52
  - 53
  - 54
  - 55
  - 56
  - 57
  - 58
  - 59
  - 60
16. Lambiase PD. Reinforcing the Links in the Chain of Survival. *J Am Coll Cardiol* 2017;**70**(9):1118-20.
17. Pijls RW, Nelemans PJ, Rahel BM, et al. A text message alert system for trained volunteers improves out-of-hospital cardiac arrest survival. *Resuscitation* 2016;**105**:182-7.
18. Phung VH, Trueman I, Togher F, et al. Community first responders and responder schemes in the United Kingdom: systematic scoping review. *Scandinavian Journal Of Trauma Resuscitation & Emergency Medicine* 2017;**25**.
19. Phung VH, Trueman I, Togher F, et al. Perceptions and experiences of community first responders on their role and relationships: qualitative interview study. *Scandinavian Journal Of Trauma Resuscitation & Emergency Medicine* 2018;**26**.
20. Timmons S, Vernon-Evans A. Why do people volunteer for community first responder groups? *Emerg Med J* 2013;**30**(3):e13.
21. Davies E, Maybury B, Colquhoun M, et al. Public Access Defibrillation: Psychological consequences in responders. *Resuscitation* 2008;**77**(2):201-06.
22. Harrison-Paul R, Timmons S, Schalkwyk WDV. Training lay-people to use automatic external defibrillators: Are all of their needs being met? *Resuscitation* 2006;**71**(1):80-88.
23. Zijlstra JA, Beesems SG, De Haan RJ, et al. Psychological impact on dispatched local lay rescuers performing bystander cardiopulmonary resuscitation. *Resuscitation* 2015;**92**:115-21.
24. Peberdy MA, Ottingham LV, Groh WJ, et al. Adverse events associated with lay emergency response programs: the public access defibrillation trial experience. *Resuscitation* 2006;**70**(1):59-65.
25. Braun V, Clarke V. (Mis)conceptualising themes, thematic analysis, and other problems with Fugard and Potts' (2015) sample-size tool for thematic analysis. *International Journal of Social Research Methodology* 2016;**19**(6):739-43.
26. Brooks SC, Simmons G, Worthington H, et al. The PulsePoint Respond mobile device application to crowdsource basic life support for patients with out-of-hospital cardiac arrest: Challenges for optimal implementation. *Resuscitation* 2016;**98**:20-26.
27. Smith CM, Wilson MH, Ghorbangholi A, et al. The use of trained volunteers in the response to out-of-hospital cardiac arrest – the GoodSAM experience. *Resuscitation* 2017;**121**:123-26.

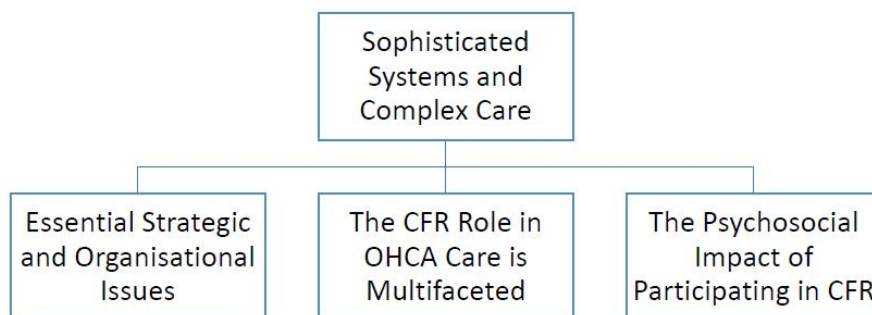

Figure 1

243x105mm (96 x 96 DPI)

## Standards for Reporting Qualitative Research (SRQR)\*

<http://www.equator-network.org/reporting-guidelines/srqr/>

Page/line no(s).

### Title and abstract

|                                                                                                                                                                                                                                                              |       |
|--------------------------------------------------------------------------------------------------------------------------------------------------------------------------------------------------------------------------------------------------------------|-------|
| <p><b>Title</b> - Concise description of the nature and topic of the study Identifying the study as qualitative or indicating the approach (e.g., ethnography, grounded theory) or data collection methods (e.g., interview, focus group) is recommended</p> | Pg. 1 |
| <p><b>Abstract</b> - Summary of key elements of the study using the abstract format of the intended publication; typically includes background, purpose, methods, results, and conclusions</p>                                                               | Pg. 2 |

### Introduction

|                                                                                                                                                                     |       |
|---------------------------------------------------------------------------------------------------------------------------------------------------------------------|-------|
| <p><b>Problem formulation</b> - Description and significance of the problem/phenomenon studied; review of relevant theory and empirical work; problem statement</p> | Pg. 5 |
| <p><b>Purpose or research question</b> - Purpose of the study and specific objectives or questions</p>                                                              | Pg. 2 |

### Methods

|                                                                                                                                                                                                                                                                                                                                                                                                             |       |
|-------------------------------------------------------------------------------------------------------------------------------------------------------------------------------------------------------------------------------------------------------------------------------------------------------------------------------------------------------------------------------------------------------------|-------|
| <p><b>Qualitative approach and research paradigm</b> - Qualitative approach (e.g., ethnography, grounded theory, case study, phenomenology, narrative research) and guiding theory if appropriate; identifying the research paradigm (e.g., postpositivist, constructivist/ interpretivist) is also recommended; rationale**</p>                                                                            | Pg. 6 |
| <p><b>Researcher characteristics and reflexivity</b> - Researchers' characteristics that may influence the research, including personal attributes, qualifications/experience, relationship with participants, assumptions, and/or presuppositions; potential or actual interaction between researchers' characteristics and the research questions, approach, methods, results, and/or transferability</p> | Pg. 6 |
| <p><b>Context</b> - Setting/site and salient contextual factors; rationale**</p>                                                                                                                                                                                                                                                                                                                            | Pg. 6 |
| <p><b>Sampling strategy</b> - How and why research participants, documents, or events were selected; criteria for deciding when no further sampling was necessary (e.g., sampling saturation); rationale**</p>                                                                                                                                                                                              | Pg.6  |
| <p><b>Ethical issues pertaining to human subjects</b> - Documentation of approval by an appropriate ethics review board and participant consent, or explanation for lack thereof; other confidentiality and data security issues</p>                                                                                                                                                                        | Pg. 6 |
| <p><b>Data collection methods</b> - Types of data collected; details of data collection procedures including (as appropriate) start and stop dates of data collection and analysis, iterative process, triangulation of sources/methods, and modification of procedures in response to evolving study findings; rationale**</p>                                                                             | Pg. 7 |

|                       |                                                                                                                                                                                                                                                       |        |
|-----------------------|-------------------------------------------------------------------------------------------------------------------------------------------------------------------------------------------------------------------------------------------------------|--------|
| 1<br>2<br>3<br>4<br>5 | <b>Data collection instruments and technologies</b> - Description of instruments (e.g., interview guides, questionnaires) and devices (e.g., audio recorders) used for data collection; if/how the instrument(s) changed over the course of the study | Pg. 6  |
| 6<br>7<br>8           | <b>Units of study</b> - Number and relevant characteristics of participants, documents, or events included in the study; level of participation (could be reported in results)                                                                        | Pg. 6  |
| 9<br>10<br>11<br>12   | <b>Data processing</b> - Methods for processing data prior to and during analysis, including transcription, data entry, data management and security, verification of data integrity, data coding, and anonymization/de-identification of excerpts    | Pg. 7  |
| 13<br>14<br>15<br>16  | <b>Data analysis</b> - Process by which inferences, themes, etc., were identified and developed, including the researchers involved in data analysis; usually references a specific paradigm or approach; rationale**                                 | Pg. 7  |
| 17<br>18<br>19<br>20  | <b>Techniques to enhance trustworthiness</b> - Techniques to enhance trustworthiness and credibility of data analysis (e.g., member checking, audit trail, triangulation); rationale**                                                                | Pg.6/7 |

## Results/findings

|                      |                                                                                                                                                                                                   |                 |
|----------------------|---------------------------------------------------------------------------------------------------------------------------------------------------------------------------------------------------|-----------------|
| 23<br>24<br>25<br>26 | <b>Synthesis and interpretation</b> - Main findings (e.g., interpretations, inferences, and themes); might include development of a theory or model, or integration with prior research or theory | Pg. 7-12        |
| 27<br>28<br>29       | <b>Links to empirical data</b> - Evidence (e.g., quotes, field notes, text excerpts, photographs) to substantiate analytic findings                                                               | Tables Pg. 9-13 |

## Discussion

|                                  |                                                                                                                                                                                                                                                                                                                                                                                                             |           |
|----------------------------------|-------------------------------------------------------------------------------------------------------------------------------------------------------------------------------------------------------------------------------------------------------------------------------------------------------------------------------------------------------------------------------------------------------------|-----------|
| 32<br>33<br>34<br>35<br>36<br>37 | <b>Integration with prior work, implications, transferability, and contribution(s) to the field</b> - Short summary of main findings; explanation of how findings and conclusions connect to, support, elaborate on, or challenge conclusions of earlier scholarship; discussion of scope of application/generalizability; identification of unique contribution(s) to scholarship in a discipline or field | Pg. 12/13 |
| 38<br>39                         | <b>Limitations</b> - Trustworthiness and limitations of findings                                                                                                                                                                                                                                                                                                                                            | Pg. 14    |

## Other

|                |                                                                                                                                               |          |
|----------------|-----------------------------------------------------------------------------------------------------------------------------------------------|----------|
| 42<br>43<br>44 | <b>Conflicts of interest</b> - Potential sources of influence or perceived influence on study conduct and conclusions; how these were managed | Pg. 14/3 |
| 45<br>46       | <b>Funding</b> - Sources of funding and other support; role of funders in data collection, interpretation, and reporting                      | Pg 3     |

\*The authors created the SRQR by searching the literature to identify guidelines, reporting standards, and critical appraisal criteria for qualitative research; reviewing the reference lists of retrieved sources; and contacting experts to gain feedback. The SRQR aims to improve the transparency of all aspects of qualitative research by providing clear standards for reporting qualitative research.

1  
2  
3  
4  
5  
6  
7  
8  
9  
10  
11  
12  
13  
14  
15  
16  
17  
18  
19  
20  
21  
22  
23  
24  
25  
26  
27  
28  
29  
30  
31  
32  
33  
34  
35  
36  
37  
38  
39  
40  
41  
42  
43  
44  
45  
46  
47  
48  
49  
50  
51  
52  
53  
54  
55  
56  
57  
58  
59  
60

\*\*The rationale should briefly discuss the justification for choosing that theory, approach, method, or technique rather than other options available, the assumptions and limitations implicit in those choices, and how those choices influence study conclusions and transferability. As appropriate, the rationale for several items might be discussed together.

**Reference:**

O'Brien BC, Harris IB, Beckman TJ, Reed DA, Cook DA. **Standards for reporting qualitative research: a synthesis of recommendations.** *Academic Medicine*, Vol. 89, No. 9 / Sept 2014  
DOI: 10.1097/ACM.0000000000000388

For peer review only

# BMJ Open

## Motivation, challenges and realities of volunteer community cardiac arrest response: A qualitative study of 'lay' community first responders

|                                 |                                                                                                                                                                                               |
|---------------------------------|-----------------------------------------------------------------------------------------------------------------------------------------------------------------------------------------------|
| Journal:                        | <i>BMJ Open</i>                                                                                                                                                                               |
| Manuscript ID                   | bmjopen-2019-029015.R1                                                                                                                                                                        |
| Article Type:                   | Research                                                                                                                                                                                      |
| Date Submitted by the Author:   | 10-Mar-2019                                                                                                                                                                                   |
| Complete List of Authors:       | Barry, Tomás ; University College Dublin, School of Medicine; CEMS Guerin, Suzanne; University College Dublin, School of Psychology Bury, Gerard; University College Dublin, General Practice |
| <b>Primary Subject Heading</b>: | Emergency medicine                                                                                                                                                                            |
| Secondary Subject Heading:      | Public health, Qualitative research                                                                                                                                                           |
| Keywords:                       | ACCIDENT & EMERGENCY MEDICINE, EDUCATION & TRAINING (see Medical Education & Training), PUBLIC HEALTH                                                                                         |
|                                 |                                                                                                                                                                                               |

SCHOLARONE™  
Manuscripts



1  
2  
3 **Motivation, challenges and realities of volunteer community cardiac arrest response: A qualitative**  
4 **study of 'lay' community first responders**  
5  
6  
7

8 **Tomas Barry<sup>1</sup>, Suzanne Guerin<sup>2</sup> & Gerard Bury<sup>1</sup>**  
9

- 10  
11  
12 1. UCD Centre for Emergency Medical Science, School of Medicine, Health Sciences  
13 Centre, University College Dublin, Belfield, Dublin 4, Ireland  
14  
15 2. School of Psychology, University College Dublin, Belfield, Dublin 4, Ireland  
16  
17  
18  
19  
20  
21  
22  
23

24 Send correspondence to:

Dr Tomás Barry,

UCD Centre for Emergency Medical Science

School of Medicine,

Health Sciences Centre,

University College Dublin,

Belfield, Dublin 4, Ireland

Tel: +353 (0) 17166693

Email: tomas.barry@ucd.ie

25  
26  
27  
28  
29  
30  
31  
32  
33  
34  
35  
36  
37  
38  
39  
40  
41  
42  
43  
44  
45  
46  
47  
48  
49  
50  
51  
52  
53  
54  
55  
56  
57  
58  
59  
60

1  
2  
3 **Motivation, challenges and realities of volunteer community cardiac arrest response: A qualitative**  
4 **study of 'lay' community first responders**  
5  
6  
7

8 **Abstract**  
9

10  
11  
12 Objectives

13 To explore the reasons why lay community first responders (CFRs) volunteer to participate in out-of-  
14 hospital cardiac arrest response and the realities of their experience in providing this service to the  
15 community.  
16

17  
18 Design

19 A qualitative study, utilising in-depth semi-structured interviews that were recorded and  
20 transcribed. Thematic analysis was undertaken and credibility checks conducted.  
21

22  
23 Setting

24 Nine geographically varied lay CFR schemes throughout the Republic of Ireland.  
25

26  
27 Participants

28 Twelve experienced community first responders.  
29

30  
31 Results

32 CFRs were motivated to participate based on a variety of factors. These included altruistic, social and  
33 pre-existing emergency care interest. A proportion of CFRs may volunteer because of experience of  
34 cardiac arrest or illness in a relative. Sophisticated structures and complex care appear to underpin  
35 CFR involvement in out-of-hospital cardiac arrest. Strategic and organisational issues, multifaceted  
36 cardiac arrest care and the psychosocial impact of participation were considered.  
37  
38

39  
40 Conclusions

41 Health systems that facilitate CFR out-of-hospital cardiac arrest response should consider a variety of  
42 relevant issues. These issues include the suitability of those that volunteer, complexities of  
43 resuscitation/end-of-life care, responder psychological welfare as well as CFRs core role of providing  
44 early basic life support and defibrillation in the community.  
45  
46  
47  
48  
49  
50  
51  
52  
53  
54  
55  
56  
57  
58  
59  
60

### Strengths and limitations of the study

- This is the first study to explore both the reasons CFRs volunteer to provide cardiac arrest response and the realities of CFRs experience in providing this care.
- As a qualitative study this research has facilitated the acquisition of novel data that generates important hypothesis with significant implications for systems that deploy community first responders to cardiac arrest.
- Further research is needed to explore the findings in greater detail and to establish whether the results of this research apply more generally.

### Funding Source

This research was supported by an Irish College of General Practitioners research grant. The funder had no role in data collection, analysis or in the preparation of this manuscript.

### Competing Interests

TB & GB are general practitioners who participate voluntarily in OHCA community response and declare no other conflicts of interest.

SG is an academic researcher with experience of health services research. She has no conflict of interest to declare.

### Ethics and Patient Consent

Ethical approval was granted by the UCD Human Research Ethics committee Ref LS-17-42-Barry and participant informed consent was obtained prior to the commencement of data collection.

### Acknowledgements

The research team acknowledge the assistance of CFR Ireland and Dr David Menzies in planning and carrying out this research.

We would also like to specifically thank the CFRs who participated.

### Author Contributions

TB conceived the study. TB SG & GB contributed to the design of the study. TB acquired the data. TB, SG & GB interpreted and analysed the data. TB drafted the manuscript which was critically revised

1  
2  
3 for important intellectual content by all authors, who approved the final version. TB is guarantor for  
4 the study.  
5  
6  
7

#### 8 **Data Sharing**

9  
10 No additional data available.  
11  
12

13  
14 **Word Count** 4005  
15  
16  
17  
18  
19  
20  
21  
22  
23  
24  
25  
26  
27  
28  
29  
30  
31  
32  
33  
34  
35  
36  
37  
38  
39  
40  
41  
42  
43  
44  
45  
46  
47  
48  
49  
50  
51  
52  
53  
54  
55  
56  
57  
58  
59  
60

For peer review only

## **Motivation, challenges and realities of volunteer community cardiac arrest response: A qualitative study of 'lay' community first responders**

### **Main Text**

#### **Introduction**

##### **Background**

Approximately 275,000 people are treated for out-of-hospital cardiac arrest (OHCA) in Europe annually but only one in ten survive<sup>1</sup>. Successful resuscitation is largely determined by the early availability of CPR (cardio-pulmonary resuscitation) and defibrillation within the community. The efficacy of these treatments is critically time sensitive<sup>2</sup>. Community first responders (CFRs) are volunteers who live or work within a community and are organised in a framework which offers OHCA care in that community to supplement the standard ambulance service response<sup>3</sup>. By virtue of their presence in the community, CFRs may reach patients earlier than the statutory ambulance service and thus shorten the collapse to CPR/defibrillation interval. The role of OHCA CFR is thus to provide early basic life support care involving CPR and Defibrillation. International research has demonstrated that CFRs can play a significant role in early CPR, defibrillation and potentially OHCA survival<sup>4-7</sup>.

Ireland has a population of 4.7 million<sup>8</sup>. Approximately 2000 OHCA are dealt with by the Irish ambulance services annually; although survival is rising, it remains in the region of seven percent<sup>9</sup>. One third of Ireland's population live in rural areas<sup>9</sup>. Only nine percent of rural Irish OHCA patients receive a statutory ambulance response within the national target timeframe of eight minutes or less; ultimately rural OHCA patients are less likely to be discharged alive from hospital<sup>10</sup>. Given Ireland's settlement pattern, the deployment of CFRs to OHCA has been embraced as a key public health response to OHCA and CFR schemes have been developed both in urban and rural areas. In Ireland, CFRs are volunteers who are activated by text message alert from the statutory ambulance service. CFR categories include off duty ambulance service staff, fire service CFRs, family doctors and lay CFR groups<sup>11</sup>. This study focuses on lay CFR groups. Several dozen people may join any individual group. Although groups do not have professional medical responsibilities, off duty healthcare staff sometimes also join and contribute as volunteers. Accreditation occurs through the National Ambulance Service and CFRs 'go live' when training, equipment, activation and support structures are in place. Most lay CFR groups operate by having a roster of two-person teams who carry a dedicated alert phone, defibrillator and basic life support equipment to cover defined periods for their area. When an alert is received, the CFR(s) respond using normal driving rules.

##### **Importance**

1  
2  
3 Despite the observation that CFRs are established as a key element of OHCA response in Ireland and  
4 over 500 individual response schemes (including approximately 200 lay CFR groups) are now in place,  
5 virtually no data is available concerning CFR activities. Research in this area is urgently required.  
6

7 The involvement of lay CFRs in OHCA resuscitation is unique in terms of a healthcare systems response  
8 to a life threatening emergency situation. It is not without risk. It involves the deployment of  
9 volunteers with minimal training to the most high acuity medical situations in their own communities  
10 and has raised potential concerns in terms of professional gatekeeping, training and supervision<sup>5</sup>.  
11 Furthermore, with an incidence rate in Ireland of 50 per 100,000 population per year, OHCA is likely  
12 to be a rare event for individual CFR schemes especially in rural communities<sup>9</sup>. Ultimately the  
13 engagement of CFRs will need to be sustained over time. Despite the observation that CFR deployment  
14 has emerged as an increasingly common OHCA intervention internationally and is being embraced by  
15 various EMS systems, very little research has been carried out to explore the motivation, experience  
16 or perceptions of this key group of people.  
17  
18  
19

### 20 Goals of This Investigation

21  
22 The aim of this study is to explore the reasons why lay CFRs volunteer to participate in OHCA response  
23 and the realities of their experience in providing this service to the community.  
24  
25  
26

## 27 **Methods**

### 28 29 30 31 Study design and setting

32 A qualitative study, utilising in-depth semi-structured interviews followed by thematic analysis was  
33 undertaken. The study setting was geographically distributed lay CFR groups, both rural and urban  
34 throughout Ireland. The type of qualitative approach employed was phenomenological; the research  
35 process focused on understanding the participant's view of self and their surrounding world in the  
36 specific context of OHCA response<sup>12</sup>. The methodological approach was informed by the standards for  
37 reporting of qualitative research outlined by O'Brien et al 2014<sup>13</sup> and the analytic approach outlined  
38 by Braun & Clarke 2008<sup>14</sup>. Steps to ensure credibility in the analysis process were also conducted and  
39 are described below. Ethical approval was granted by the UCD Human Research Ethics committee (Ref  
40 LS-17-42-Barry) and participant informed consent was obtained prior to the commencement of data  
41 collection.  
42  
43  
44  
45  
46

### 47 Selection of Participants'

48  
49 A purposive approach to sampling was undertaken, with recruitment through Irelands dedicated CFR  
50 network (CFR Ireland). In order to gain a spread of perspectives and experience the research team  
51 specifically requested that CFR Ireland help recruit 'twelve CFRs with experience of OHCA response  
52 from four different geographical areas'. All CFRs dispatched by the ambulance service in Ireland have  
53 undergone at minimum, a specific half day training course in basic life support and AED use. In addition  
54 each participant was required to have personal experience of responding to cardiac arrest in the  
55 community. No specific incentive or reward for participation was offered beyond highlighting the  
56 value of contributing to increased understanding of this scientific field. A study information leaflet was  
57 provided to each participant prior to enrolment. In advance of the study we considered the potential  
58 that topics discussed might be distressing for participants and it was made clear that participants were  
59  
60

1  
2  
3 free to pass on any topics they found uncomfortable. Provisions were made to refer participants to  
4 their own family doctor if distress was experienced from participation in the study.  
5

#### 6 Data Collection 7

8 One researcher (TB) conducted all interviews, which were face to face and took place at various  
9 locations convenient for the relevant CFR(s). Interviews took place between September and December  
10 2017. Prior to conducting interviews TB & SG (an experienced qualitative researcher) formally planned  
11 the interview process; potential biases were considered via a reflective process and a formal reflexivity  
12 statement was composed. The researcher (TB) aimed to identify any personal biases that might affect  
13 the research process or results.  
14  
15

16 *The observation that the researcher came from the 'world view perspective' of a doctor who himself*  
17 *participated in cardiac arrest response was considered in detail at this stage.*  
18

19 A semi-structured interview format was undertaken to allow flexibility of response and follow up  
20 'unplanned' questions to facilitate a participant led exploration of topics<sup>12</sup>. This approach involved a  
21 pre-prepared interview guide/schedule to facilitate overall structure but did not require rigid  
22 adherence to precise wording of questions or the order in which they were asked<sup>15</sup>. The written  
23 interview schedule considered two key domains; 1) the participant's motivation to participate in the  
24 scheme and 2) the realities of providing first response to cardiac arrest in the community. Each domain  
25 involved standard initial open ended 'prompt' questions and flexible 'follow on' questions based on  
26 the interviewees' initial responses. Informed written and verbal consent were obtained before  
27 commencing each interview. The initial interview acted as a pilot where the candidate was asked to  
28 give feedback and suggestions regarding the interview process. Immediately following each other  
29 interview reflections concerning interview process and content were recorded as field notes in a  
30 research diary. All interviews were recorded using a Zoom H2n professional grade recorder and later  
31 professionally transcribed. The transcripts were then checked against the tapes for accuracy and  
32 minor corrections were made as necessary.  
33  
34  
35

#### 36 Data Analysis 37

38 Data was analysed using the thematic analysis framework outlined by Braun and Clarke<sup>14</sup>. Thematic  
39 analysis is a method for identifying, analysing and reporting themes within data. It involves six phases;  
40 'Data familiarisation', 'Generating initial codes', 'Searching for themes', 'Reviewing themes', 'Defining  
41 and naming themes' and 'Producing a report'. Initial coding and all further phases were conducted  
42 using NVIVO 11 for Windows. An experienced qualitative researcher (SG) acted as co-researcher at all  
43 stages of the analytic process to ensure credibility. SG coded a sample of the dataset (one interview)  
44 independently and reviewed all candidate and final worked out themes with TB thus supporting a  
45 reflexive process throughout the data analysis. The analysis produced a structure of themes in relation  
46 to key domains that reflect the focus of the study.  
47  
48  
49  
50  
51

#### 52 Patient and Public Involvement 53

54 Neither patients nor the public were involved in the design or conduct of this research.  
55  
56

## 57 Results

### 58 Characteristics of the study subjects 59 60

CFR Ireland contacted fifteen geographically disparate CFR groups on behalf of the research team. Selection of groups was a matter for CFR Ireland who reported to the research team that they *'selected groups and individuals based on urban or rural, large or small, very busy or not so busy, gender mix and attempting to give a national spread.'* CFR Ireland reported they *'contacted 15 groups to increase the likelihood of ultimately a good spread of 12 different CFRs.'* Where a group expressed interest, permission was obtained for the research team to contact a nominated person from that relevant group directly. Twelve groups offered permission, two of whom were identified as new groups unlikely to have yet participated in a cardiac arrest response and thus were excluded from the study.

Ultimately nine of the remaining ten groups participated in the research. Twelve CFRs of varying ages and representing those nine geographically distributed lay CFR groups self-selected to participate. Given the sensitivity of the topic area detailed demographic participant elements were not profiled quantitatively, however all participants described extensive experience of OHCA response over a number of years. A total of ten in-depth interviews were conducted; on two occasions, two CFRs representing a single CFR group chose to be interviewed together. Two further participants interviewed were from one individual CFR group. All interviews were included in data analysis. Gender was equally distributed among participants. Most participants occupied a senior role (for example scheme coordinator) within their respective CFR group. Two participants had a professional healthcare background. Interview duration ranged from 45 to 108 minutes, median duration was 58 minutes. No participants elected to 'pass' on any topics raised in the interviews and no psychosocial distress was reported related to participating in the study.

## Main Results

### Domain (1): Motivation to participate

The results of thematic analysis considering the domain of 'motivation to participate' are reported in Table 1. Participants outlined that some CFRs were motivated to volunteer by an interest in emergency care. Some CFRs worked as healthcare professionals although this could be challenging as the extra burden of knowledge could distract from the core basic life support tasks of a CFR. CFRs were also motivated to participate based on a desire to give back to the community or as a means of social engagement. The inherent satisfaction in 'saving a life' was also highlighted. A proportion of CFRs were motivated to volunteer based on past experience of OHCA incidents. For some, this was a response to having felt unprepared and unskilled in such a situation. For others the desire to volunteer related to a family experience of illness or OHCA. Although many such volunteers were considered to cope well psychologically with the CFR role, respondents noted that for some individuals engaging in CFR activities was known to have caused psychological distress. A minority population of those that volunteer appeared to be motivated by the dramatic elements of emergency care. One participant termed this group 'Blue Light Junkies'. Most participants appeared to have an awareness of this volunteer type and some considered their attributes to be incompatible with the calm affect and strong interpersonal skills considered necessary for the CFR role.



Table 1: Motivation to participate, Key Themes

| Theme                               | Theme Description                                                                                                                                                                                                                             | Illustrative Quote(s)                                                                                                                                                                                                                                                          |
|-------------------------------------|-----------------------------------------------------------------------------------------------------------------------------------------------------------------------------------------------------------------------------------------------|--------------------------------------------------------------------------------------------------------------------------------------------------------------------------------------------------------------------------------------------------------------------------------|
| Existing skills and interest        | Volunteer CFRs may already have an interest in emergency care, be healthcare professionals or come with first aid training. CFR activity might also be a means by which a lay person with an interest in healthcare can pursue this interest. | <i>CFR10: What we found is, it tends to be people who have some sort of a first aid background already that do it. So a lot of the people that joined us initially would have been the first aider in their rugby club, or the first aider in work, or something like that</i> |
| Giving back to the community        | CFR was seen as a means of doing something good for and giving back to the 'community', thus resulting in personal satisfaction.                                                                                                              | <i>CFR9: Like that you're there, you're involved, giving something back, but it's for free, it's voluntary. It's brilliant, you know</i>                                                                                                                                       |
| Getting involved with the community | Participation in CFR could be a means of engaging with the community and making social contacts.                                                                                                                                              | <i>CFR6: I could never give back what I got out of the scheme, could never, after 12 years. I could never repay what I've got. I've met some of the...some of my closest friends now, through the scheme</i>                                                                   |
| Saving a life                       | Participation in CFR offered the potential to 'save a life'. This had inherent personal satisfaction.                                                                                                                                         | <i>CFR9: But for like the good ones where it's an arrest you get there, you shock them, they're back and discharged back home. Like there's no better feeling than actually being involved with that</i>                                                                       |

|                             |                                                                                                                                                                                                                                                         |                                                                                                                                                                                                                                                                                                                                                                                                                                                                                                                                                                                                 |
|-----------------------------|---------------------------------------------------------------------------------------------------------------------------------------------------------------------------------------------------------------------------------------------------------|-------------------------------------------------------------------------------------------------------------------------------------------------------------------------------------------------------------------------------------------------------------------------------------------------------------------------------------------------------------------------------------------------------------------------------------------------------------------------------------------------------------------------------------------------------------------------------------------------|
| Personal experience of OHCA | Personal experience of OHCA was a potential motivator. This could involve a situation where a volunteer had encountered OHCA and felt helpless/was left with a feeling of needing to act on this. It could also involve family members of OHCA victims. | <i>CFR8: Well for me personally it was an incident I witnessed in a shopping centre... So unfortunately for the man, I suppose for everyone involved, the man died and passed away and I felt very helpless and I kept saying 'God this is tragic, because nobody knew what to do. We just stood around.' And I said 'Look, I hope I'll never feel like this again. I'm going to learn.'</i> <i>CFR1: A cohort have family issues, as in, something happened, or they have a child who maybe has cardiac problems, etcetera. That, I might come back to that later, that can be challenging</i> |
| 'Blue Light Junkies'        | A minority of individuals can be motivated to participate based on a desire to engage with elements of OHCA response that are perceived as exciting or dramatic.                                                                                        | <i>CFR2: Yeah, I think some people probably have the, what do we refer to it is. I can't think actually the name we use, but basically they want to be Superman and they want to rush in and save people's lives and they're only dying to paint 'battenbergs' on the side of their cars and get blue lights – which obviously you're not allowed to do – but there is that element, that some of the people in the room, it's a real gung-ho macho kind of a thing</i>                                                                                                                         |

### Domain (2): The realities of providing first response to cardiac arrest in the community

A thematic map considering the domain of 'the realities of providing first response to cardiac arrest in the community' is shown in figure 1. A unifying overall umbrella theme was evident reflecting the observation that the systems underpinning CFR care are sophisticated and the care provided is complex. Three key follow-on themes were evident: 'essential strategic and organisational issues', 'the CFR role in OHCA is multifaceted' and the 'psychosocial impact of participating in CFR'. A number of follow on sub-themes were also apparent and are described below.

Fig 1: Thematic Map - Realities of providing first response to cardiac arrest in the community.

\*\*\*Figure 1 here please\*\*\*

The first key theme 'essential strategic and organisational issues' is reported in table 2, with sub-themes identified by respondents. Participants highlighted the importance of community engagement, fundraising and cascading basic life support to the community. There was recognition that although not everyone might be suitable for the CFR role there were various other 'support' roles available to those wishing to volunteer. There was evidence that CFR groups had developed processes of screening and supported induction for new members. The voluntary/ community nature of the scheme was considered to pose challenges in terms of group dynamics and conflict. The importance of training for the role of CFR was highlighted. Anxieties in terms of locating patients in OHCA quickly were discussed as was the value of smartphone mapping and 'eircodes' (postcodes) in expediting this process. Safe driving was an evident priority. There were conflicting perspectives on CFR scope of practice. In general, CFR interactions with ambulance services management were considered positive however there was some frustration evident around a lack of financial support, and a perceived high level of caution on the part of health services management around CFR activities.

Table 2. Key theme 'Essential strategic and organisational issues' with sub-themes

| Sub-Theme            | Sub-Theme Description                                                                                                          | Illustrative Quote(s)                                                                                                                                                                                                                                                                                                                                                 |
|----------------------|--------------------------------------------------------------------------------------------------------------------------------|-----------------------------------------------------------------------------------------------------------------------------------------------------------------------------------------------------------------------------------------------------------------------------------------------------------------------------------------------------------------------|
| Community engagement | Community engagement was important for recruitment, fundraising and cascading basic life support skills/AEDs to the community. | <i>CFR5: When we're training we actually go out into the community like. Housing estates, the kids are fantastic, once they see something different going on they are like that. The word spreads so then we have a crowd. So, yes, so it is basically from being out around in the community doing different demonstrations, fundraising, all that kind of stuff</i> |

|                                                                           |                                                                                                                                                                                                                                                          |                                                                                                                                                                                                                                                                                                                                                                                                                                                                                                                                                                                                                                                                                                                                                                          |
|---------------------------------------------------------------------------|----------------------------------------------------------------------------------------------------------------------------------------------------------------------------------------------------------------------------------------------------------|--------------------------------------------------------------------------------------------------------------------------------------------------------------------------------------------------------------------------------------------------------------------------------------------------------------------------------------------------------------------------------------------------------------------------------------------------------------------------------------------------------------------------------------------------------------------------------------------------------------------------------------------------------------------------------------------------------------------------------------------------------------------------|
| <p>Recruitment, screening and potential for different volunteer roles</p> | <p>Ongoing recruitment was important. Screening was important as not everyone is suitable for the CFR role but it is also not possible to exclude individuals as a community organisation. A variety of additional roles outside of responder exist.</p> | <p><i>CFR1: We have had a couple of situations where (people) appear to have come and done the training to get it on their CV, and then never shown up again. The other piece is, it's very much, we do need to see whether they are 'a fit' in terms of going into somebody's house in a very sensitive situation, we need to work out, A, have they got the skills, and B, have they got... more the people skills and the appropriateness skills. So we don't rush them in</i><br/> <i>CFR2: I mean most of the people are very competent but there are people there that I just wouldn't be 100% sure of. But unfortunately, in a community group, you know, unless I think somebody is actually dangerous, we're not in a position to tell them to go away.</i></p> |
| <p>Supporting new members</p>                                             | <p>Supported induction was important.</p>                                                                                                                                                                                                                | <p><i>CFR3: When anyone (is) first kind of qualified they're told you can only go if responder A is on and you're responder B and only if they're going because it's not good for you to be going on your own for the first few calls.</i></p>                                                                                                                                                                                                                                                                                                                                                                                                                                                                                                                           |
| <p>Training</p>                                                           | <p>Ongoing training was important.</p>                                                                                                                                                                                                                   | <p><i>CFR4: We train twice a month now, you know. And we change all the scenarios and that we sit down and have discussions about - as to how did our last call go? Is there something else that maybe you should have done when you think back on it? Or what difficulties did you have on that call?</i></p>                                                                                                                                                                                                                                                                                                                                                                                                                                                           |
| <p>Dispatch</p>                                                           | <p>Time pressures exist in locating the patient in OHCA. Potential technological solutions such as smart phone mapping were used. Safe driving was a priority.</p>                                                                                       | <p><i>CFR1: I think the anxiety about getting there. I suppose the biggest anxiety for the volunteers is, will I be able to find the house. That is the thing that keeps them awake at night.</i><br/> <i>CFR10: Google Maps is the answer to pretty much everything</i><br/> <i>CFR3: So you have to remain calm, you have to abide by the rules of the road, obviously, and that can be a bit stressful if you hit traffic but you just have to. You just have to say to yourself I'm just doing my best and the ambulance is on its way anyways</i></p>                                                                                                                                                                                                               |
| <p>Group dynamics and conflict</p>                                        | <p>The voluntary nature of community groups was highlighted as a challenge in terms of group conflict and cohesion.</p>                                                                                                                                  | <p><i>CFR3: And, as with all volunteer groups, there will be issues thrown up. I know one person did leave because she didn't feel welcomed or something, now I think that was probably on her side a bit. So there's going to be issues like that with any group of volunteers</i></p>                                                                                                                                                                                                                                                                                                                                                                                                                                                                                  |

|                                                    |                                                                                                                                                                                                                                              |                                                                                                                                                                                                                                                                                                                                                                                                                                                                                                                                                                                                                                                                                                                                                                                                                                                  |
|----------------------------------------------------|----------------------------------------------------------------------------------------------------------------------------------------------------------------------------------------------------------------------------------------------|--------------------------------------------------------------------------------------------------------------------------------------------------------------------------------------------------------------------------------------------------------------------------------------------------------------------------------------------------------------------------------------------------------------------------------------------------------------------------------------------------------------------------------------------------------------------------------------------------------------------------------------------------------------------------------------------------------------------------------------------------------------------------------------------------------------------------------------------------|
| Scope of practice                                  | Conflicting opinions existed re CFR scope of practice; some believed 'best to stick to the basics' while others want to do more.                                                                                                             | <p><i>CFR12: I keep saying to my guys, our guys, 'Get this right first and then we might give a look at something else', ... but definitely I wouldn't be that keen to broaden the range. I don't see our guys really behaving themselves and concentrating on their skill level</i></p> <p><i>CFR4: We've a paramedic on board but we're not allowed to use oxygen. There's loads of things that we can't do that we're trained in doing, you know. Then there's new drugs coming in that, has got the licence to you know certify us in administrating these drugs and that and we're not even allowed to use this.</i></p>                                                                                                                                                                                                                    |
| Support & friction at the health service interface | Key health services individuals and structures were considered to support CFR however limited financial support was available. At times some frustration with what was perceived as an overly cautious health services approach was evident. | <p><i>CFR1: So ('X') is the CFR coordinator when there was nobody doing anything, and they have been brilliant. So we had to work it all out, the policies weren't in place at the time, they're... now the policy is excellent. Whoever wrote it, seemed to cover every base, and I know it's being updated currently.</i></p> <p><i>CFR12: It's not easy sometimes dealing with the HSE. They wouldn't be too quick to change or make up their minds about stuff. Or at the same time we'd be looking at well our neighbours are dying, and you can't make your mind up, so we figure stuff out. They're very fearful that there's information out there but it's out there anyway, so I think they're fearful of making a mistake. I think for me looking at it from a non-HSE employee, they'd rather do nothing than make a mistake</i></p> |

The second parent theme 'the CFR role in OHCA care is multifaceted' is reported in table 3. A variety of CFR roles in OHCA care were highlighted ranging from providing early BLS care in advance of the ambulance service, assisting the ambulance service on their arrival and the provision of psychosocial support for families. As the 'first responders' to OHCA, CFRs had the potential to encounter challenging situations around end of life care. Difficulties around 'do not resuscitate' directives and conflicting family perspectives on the appropriateness of resuscitation were discussed. CFRs strongly valued being involved in the care process by paramedics. A minority of paramedics were perceived as having negative attitudes toward CFRs possibly because of a perspective that CFRs were undermining the paramedic role by providing a low cost alternative. The provision of psychosocial support to families was perceived as routine, important and in fact a significant overall proportion of the care CFRs provided in OHCA.

Table 3. 'The CFR role in OHCA care is multifaceted'

| Sub-Theme                 | Sub-Theme Description                                                                                                                                                                                                                       | Illustrative Quote(s)                                                                                                                                                                                                                                                                                                                                                                                                                                                                                                                                                                             |
|---------------------------|---------------------------------------------------------------------------------------------------------------------------------------------------------------------------------------------------------------------------------------------|---------------------------------------------------------------------------------------------------------------------------------------------------------------------------------------------------------------------------------------------------------------------------------------------------------------------------------------------------------------------------------------------------------------------------------------------------------------------------------------------------------------------------------------------------------------------------------------------------|
| Providing early BLS       | The provision of early BLS was of fundamental importance. Complex end of life situations could be encountered but the BLS element of care was considered straightforward.                                                                   | <i>CFR6: Look it, although it's stressful and it's very difficult, the calls you will go on will be very difficult, but what we have to do is very simple, it's very straightforward - CPR and use a defibrillator, nothing else matters</i>                                                                                                                                                                                                                                                                                                                                                      |
| Dilemmas                  | As 'first to respond' CFRs could encounter situations where difficult decisions had to be made in terms of what actions were appropriate.                                                                                                   | <i>CFR2: We'd one person in particular whose family absolutely wanted CPR done and the nurse was saying look, he's not well... and they insisted, so we did it but ...It raises big moral issues for me</i>                                                                                                                                                                                                                                                                                                                                                                                       |
| Assisting ambulance staff | CFRs were happy to assist ambulance staff as necessary and appreciated when paramedics involved them in the care process. Relationships with paramedics were mostly positive but a minority of paramedics appeared to view CFRs negatively. | <i>CFR11: I have gone in the back of the ambulance doing the breaths the whole way to the hospital, it was brilliant, absolutely brilliant but for the lads to let me do that, you know? CFR3: And we get quite a few who are quite rude and not happy to see us there, I'll be honest. But I would say it's actually only 5% but you're so almost offended by them...I would say if you were starting out as a first responder on your first few calls and you came across some of the guys that we've come across, you might be thinking, you know, what's the point in me coming out here.</i> |
| Caring for families       | Providing psychosocial support to patient's families was considered a definite and significant component of the care CFRs provide. Providing this aspect of care was satisfying for CFRs.                                                   | <i>CFR2: Their loved one has just died and they're there on their own, you know. So, it is very much a social, there's a huge social care element to it and it's something I constantly emphasise to people when they're talking about joining is that the saving a life bit will happen once in a blue moon. That really what this is about is being there, that we are there with the people as opposed to them being scared and in pain and on their own.</i>                                                                                                                                  |

The final key theme 'the psychosocial impact of participating in CFR' is reported in table 4. Participating in CFR had the potential to affect volunteers in a number of ways. For some the burden of being "on call" had been a challenge in terms of a sense of hyperarousal in anticipation of an alert. Participation

in CFR could at times result in exposure to emotionally traumatic situations and there was evidence that such situations had affected CFRs in their aftermath. For some, the interaction with family members at an OHCA event had resulted in changed relationships and social avoidance going forward. CFR wellbeing was a key issue for participants, who expressed a sense of personal responsibility for this element of participation. Internal debrief in the immediate aftermath of an incident was frequently employed as a coping strategy. Formal CFR supports such as critical incident stress management (CISM) were evident and highly valued by participants.

Table 4. 'The psychosocial impact of participating in CFR'

| Sub-Theme                                | Sub-Theme Description                                                                                                                                  | Illustrative Quote(s)                                                                                                                                                                                                                                                                                                                                                                                                                                                                                                                                                                                                                           |
|------------------------------------------|--------------------------------------------------------------------------------------------------------------------------------------------------------|-------------------------------------------------------------------------------------------------------------------------------------------------------------------------------------------------------------------------------------------------------------------------------------------------------------------------------------------------------------------------------------------------------------------------------------------------------------------------------------------------------------------------------------------------------------------------------------------------------------------------------------------------|
| The burden of being 'on-call'            | Being 'on call' could be burdensome for a proportion of CFRs. CFRs could perceive a duty to provide cover and a sense of guilt when unable to respond. | <i>CFR: He had said he was just finding it more and more and more playing on his mind. The phone, not calls that he was on, he was just more conscious that he was on call. So if he couldn't take it at night, because he was waiting for it to ring</i><br><i>CFR8: I found it a little bit of a burden at times, in that, but I was trying to cover too much and then I realised you just can't slot into every vacant slot</i>                                                                                                                                                                                                              |
| Difficult and distressing situations     | CFRs were exposed to difficult situations that could have significant psychological effects in their aftermath.                                        | <i>CFR10: It was a horrible experience, in terms of, you could hear screaming as you were approaching the driveway... it was like walking into a little horror film.</i><br><i>CFR12: And it was just dreadful what she had to endure and she happened to be on her own, she was the first on the scene. She happened to be on her own, but for me I probably wouldn't have gone in but she did. Fair play to her she went in and ...they were in bits. There was sadness, there was anger, there was fighting, there was everything. Everything thrown at her. Dreadful and it took a long time to get over it and she is still responding</i> |
| Changed relationships with the community | Providing CFR care could result in changed relationships with members of the community.                                                                | <i>CFR7: People do actually avoid you. And when it was actually said to me, they're not actually avoiding you, they're avoiding the flashbacks because when they, the last time they seen you. It brings back the memories of the last time. Well hang on, the last time I seen "X" he was on top of my mother pumping on her chest and blowing into her mouth. And all the flashbacks come back</i>                                                                                                                                                                                                                                            |

|                                  |                                                                                                                                                                   |                                                                                                                                                                                                                                                                                                                                                                                                                                                                                                                                                                                                                          |
|----------------------------------|-------------------------------------------------------------------------------------------------------------------------------------------------------------------|--------------------------------------------------------------------------------------------------------------------------------------------------------------------------------------------------------------------------------------------------------------------------------------------------------------------------------------------------------------------------------------------------------------------------------------------------------------------------------------------------------------------------------------------------------------------------------------------------------------------------|
| Volunteer wellbeing and supports | CFR wellbeing was a priority for CFR groups. Debrief and formal health services support in the form of CISM (critical incident stress management) were important. | <p><i>CFR4: It's very important when you stay in contact with all your members and find out their welfare. Because as a coordinator within a unit, it's your responsibility to make sure that all your members are safe, you know. CFR5: We have had some bad callouts but like I said we go back to the house and put the kettle on and we just go through the whole scene and just make sure everyone is alright, how are they feeling, you know</i></p> <p><i>CFR1: The CISM training is very good, it's the awareness piece. And I have to say that CISM sessions at the CFR conferences have been excellent</i></p> |
|----------------------------------|-------------------------------------------------------------------------------------------------------------------------------------------------------------------|--------------------------------------------------------------------------------------------------------------------------------------------------------------------------------------------------------------------------------------------------------------------------------------------------------------------------------------------------------------------------------------------------------------------------------------------------------------------------------------------------------------------------------------------------------------------------------------------------------------------------|

### Discussion

The deployment of lay CFRs to OHCA represents a key mechanism by which early CPR and defibrillation can be made available in the community, which in the context of the current evidence base surrounding OHCA resuscitation is the priority<sup>16</sup>. Where CFRs can reach OHCA patients quickly, increased rates of survival can be achieved<sup>17</sup>. It is thus unsurprising that the narrative of CFR care has to date focused on the provision of early CPR and defibrillation. However, this study shows that CFR care has evolved to be a sophisticated entity that includes complex decision making, a significant component dedicated to the provision of psychosocial support for bystanders and family members and also teamwork with ambulance service staff during ongoing resuscitation. It is striking that participants raised complex moral and psychological sub-themes as well as the ongoing welfare both of CFR volunteers and the families of OHCA patients in their communities. These issues highlight the need for a broad preparation and longer-term support for the CFR role. A focus on CPR skills and driving safety may have been perceived as the critical components of the role in the past but the material gleaned in this study show that those who arrive first at the scene of an OHCA can be confronted with the need to make complex decisions immediately and under pressure. Preparation for that decision making process and support in dealing with its consequences are familiar themes in professional advanced life-support resuscitation training – this study highlights their relevance for CFR volunteers also. When lay volunteers arrive at a home in which family members are conflicted about providing resuscitation to a loved one, immediate practical, moral and personal challenges arise, few of which have procedures-driven responses. The personal qualities and preparation of the CFR volunteers are the attributes which come into play in such scenarios according to study respondents. Those attributes may need to be more strongly 'screened for' and supported among volunteers.

Complexity emerges from this study as a significant finding. While CPR and defibrillation are noted by respondents to be straightforward skills, the personal and systems issues associated with the role are highly complex; respondents identify many issues which may be familiar within medical, nursing and paramedic training but which have received limited attention within 'volunteer' roles. In further developing the number and perhaps scope of new CFR schemes, the accreditation and support agencies should consider how best to address these demands.

Many of the factors that motivated CFRs in our study (prior relevant experience, a sense of altruism and the desire to engage with and make a contribution to the community) have been described



1  
2  
3 previously<sup>18-21</sup>. The issue of close personal experience of OHCA or illness in a family member as a  
4 motivator is worthy of consideration, given the possibility of associated psychological distress.  
5 Sustained CFR participation may be related to the nature of CFR interaction with paramedics.  
6 Strategies that promote positive interactions (such as involving CFRs in the care process as appropriate  
7 and educating paramedics as to the role of CFRs) could be employed by ambulance services as a  
8 mechanism to formerly support CFR retention. The volunteer phenotype described by one participant  
9 as 'blue light junkies' has not to our knowledge been previously described in the CFR literature.  
10 Participants expressed conflicting views as to whether such individuals possessed the necessary  
11 attributes for competent CFR care. The issue of 'problematic individuals' highlights an entity unique  
12 to voluntary and community organisations providing healthcare services. In contrast, professional  
13 services have a mandate and mechanism to exclude individuals considered unsuitable for the role.  
14  
15  
16

17 Concerns as to the psychological impact of participation in CFR have been highlighted in the  
18 literature<sup>18 19 22</sup>. Previous studies have however suggested that the incidence of significant prolonged  
19 adverse effects are likely to be low<sup>23 24</sup>. Participants in our study highlighted the psychologically  
20 challenging situations faced by CFRs and the importance of CFR wellbeing. This issue was actively  
21 managed by processes of volunteer screening, training, supported induction, debrief and CISM. CFRs  
22 who continue in the role may do so as a direct result of such mechanisms. Such individuals may also  
23 exhibit a resilience phenomenon<sup>21</sup>. It is however also possible that those who discontinue  
24 participation have suffered psychological ill effects. In evaluating the potential adverse effects of  
25 dispatching CFRs to OHCA such a population are likely to be of critical relevance but difficult to follow.  
26  
27  
28  
29  
30

### 31 **Limitations**

32 Our study has important limitations that should be considered when interpreting its results. The  
33 number of participants interviewed balanced the requirement for rich data acquisition with the  
34 pragmatic issue of conducting multiple in-depth face to face interviews at varied geographical  
35 locations. We adopted the approach to sampling advocated by Braun and Clarke who do not suggest  
36 the application of the principle of 'data saturation' in sample size calculation but instead highlight the  
37 exploratory and interpretative ethos of thematic analysis and the requirement to offer a compelling  
38 and coherent analysis of the data by doing justice to its complexity and the nuance contained within  
39 it<sup>14 15 25</sup>. Ultimately our analysis produced an evolved structure of themes in relation to key domains  
40 that reflect the focus of the study and its research questions. Rich data was acquired from twelve  
41 participants that generated novel findings and important hypothesis with significant potential  
42 implications for all health systems that dispatch CFRs to OHCA. Further research is ultimately needed  
43 to explore significant individual themes in greater depth and to establish whether the findings of this  
44 research apply more generally. Further qualitative research guided by the themes identified in this  
45 study as well as quantitative national and international surveys of CFRs should now be considered.  
46  
47  
48  
49

50 Although the semi-structured interview is a flexible and adaptable way of generating findings, the lack  
51 of standardisation can raise concerns about reliability and biases are ultimately difficult to rule out<sup>12</sup>.  
52 The fact that participants were recruited via CFR Ireland and self-selected to participate could result  
53 in selection bias. This strategy did however provide a sample of experienced CFRs, many of whom had  
54 strategic roles within their organisations and ultimately facilitated significant depth of topic  
55 exploration and the development of a breadth of evolved themes at data analysis. The observation  
56 that the study participants all had significant experience of OHCA response and had senior roles within  
57 their individual schemes warrants some consideration. Individuals new to CFR or with less experience  
58 of providing clinical care may have different perspectives.  
59  
60

1  
2  
3 One participant was known to the interviewer prior to the research thus potentially introducing bias  
4 in the topics discussed. The participant in question was however recruited via the standard process  
5 via CFR Ireland and in their capacity as lay CFR. Two healthcare professionals also participated in this  
6 research. Both were recruited via the mechanisms already described and in their capacity as lay CFR  
7 rather than healthcare professional. Their healthcare professional perspectives may have introduced  
8 bias however it is also possible that their inclusion reflects a phenomenon where healthcare  
9 professionals participate in varied capacities in lay CFR schemes. This interface of health professional  
10 and lay CFR was not explored in detail in this study and may warrant further consideration. It may  
11 have specific relevance in light of the complexity of the CFR role and formalising appropriate supports  
12 for CFRs in managing challenging clinical circumstances with psychosocial impacts.  
13  
14

15  
16 Thematic analysis was selected as the methodological approach for this study based on its accessibility  
17 as a qualitative research approach and its flexibility in terms of theoretical framework<sup>15</sup>. Such flexibility  
18 was considered necessary in order to facilitate a bottom up inductive analysis of the participant data,  
19 in the context of a researcher who possessed an inherent disciplinary and 'insider' standpoint. It is  
20 possible that this perspective may have influenced the analysis. Ultimately an ongoing reflexive  
21 process adopted and operationalised throughout this research project aimed to limit such biases in so  
22 far as were possible. Other steps taken to mitigate potential bias included the use of published  
23 guidelines in the development and implementation of the research, acknowledgement of the positive  
24 role of the researcher's own experience of the topic and the collaboration with an experienced  
25 qualitative researcher throughout the research process.  
26  
27  
28  
29  
30  
31  
32

### 33 **Conclusion**

34 In summary, our results suggest that the structures that underpin CFR are sophisticated and the care  
35 provided is complex. This is a striking finding in the context of a voluntary and community enterprise.  
36 We offer figure 1 and its relevant sub-themes as one potential model for lay CFR care in the  
37 community. This will need to be considered and further developed by all stakeholders.  
38  
39  
40  
41  
42  
43  
44  
45  
46  
47  
48

### 49 **References**

- 50 1. Atwood C, Eisenberg MS, Herlitz J, et al. Incidence of EMS-treated out-of-hospital cardiac arrest in  
51 Europe. *Resuscitation* 2005;**67**(1):75-80.
- 52 2. Valenzuela TD, Roe DJ, Cretin S, et al. Estimating effectiveness of cardiac arrest interventions: A  
53 logistic regression survival model. *Circulation* 1997;**96**(10):3308-13.
- 54 3. Barry T, Conroy N, Masterson S, et al. Community first responders for out-of-hospital cardiac  
55 arrest (Protocol). *Cochrane Database of Systematic Reviews* 2017, Issue 8. Art. No.:  
56 CD012764. DOI: 10.1002/14651858.CD012764.
- 57 4. Hansen CM, Kragholm K, Granger CB, et al. The role of bystanders, first responders, and  
58 emergency medical service providers in timely defibrillation and related outcomes after out-of-  
59 hospital cardiac arrest: Results from a statewide registry. *Resuscitation* 2015;**96**:303-09.  
60

- 1
- 2
- 3
- 4 5. Smith LM, Davidson PM, Halcomb EJ, et al. Can lay responder defibrillation programmes improve survival to hospital discharge following an out-of-hospital cardiac arrest? *Aust Crit Care* 2007;**20**(4):137-45.
- 5
- 6
- 7 6. Ringh M, Rosenqvist M, Hollenberg J, et al. Mobile-phone dispatch of laypersons for CPR in out-of-hospital cardiac arrest. *Resuscitation* 2015;**96**:2.
- 8
- 9 7. Zijlstra JA, Stieglis R, Riedijk F, et al. Local lay rescuers with AEDs, alerted by text messages, contribute to early defibrillation in a Dutch out-of-hospital cardiac arrest dispatch system. *Resuscitation* 2014;**85**(11):1444-49.
- 10
- 11 8. CSO. Census 2016 Summary Results - Part 1. Dublin: Central Statistics Office, 2017.
- 12 9. OHCAR. Out of Hospital Cardiac Arrest Register, Annual Report 2016. Galway, 2017.
- 13 10. Masterson S, Wright P, O'Donnell C, et al. Urban and rural differences in out-of-hospital cardiac arrest in Ireland. *Resuscitation* 2015;**91**:42-47.
- 14 11. Barry T, González A, Conroy N, et al. Mapping the potential of community first responders to increase cardiac arrest survival *Open Heart* 2018;**5**:e000912. doi: 10.1136/openhrt-2018-000912.
- 15 12. Robson C. *Real world research: a resource for users of social research methods in applied settings*. 3rd ed. Oxford: Wiley-Blackwell, 2011.
- 16 13. O'Brien BC, Harris IB, Beckman TJ, et al. Standards for Reporting Qualitative Research: A Synthesis of Recommendations. *Acad Med* 2014;**89**(9):1245-51.
- 17 14. Braun V, Clarke V. Using thematic analysis in psychology. *Qualitative Research in Psychology* 2006;**3**(2):77-101.
- 18 15. Braun V, Clarke V. *Successful qualitative research: a practical guide for beginners*. London: SAGE, 2013.
- 19 16. Lambiase PD. Reinforcing the Links in the Chain of Survival. *J Am Coll Cardiol* 2017;**70**(9):1118-20.
- 20 17. Pijls RW, Nelemans PJ, Rahel BM, et al. A text message alert system for trained volunteers improves out-of-hospital cardiac arrest survival. *Resuscitation* 2016;**105**:182-7.
- 21 18. Phung VH, Trueman I, Togher F, et al. Community first responders and responder schemes in the United Kingdom: systematic scoping review. *Scandinavian Journal Of Trauma Resuscitation & Emergency Medicine* 2017;**25**.
- 22 19. Phung VH, Trueman I, Togher F, et al. Perceptions and experiences of community first responders on their role and relationships: qualitative interview study. *Scandinavian Journal Of Trauma Resuscitation & Emergency Medicine* 2018;**26**.
- 23 20. Timmons S, Vernon-Evans A. Why do people volunteer for community first responder groups? *Emerg Med J* 2013;**30**(3):e13.
- 24 21. Davies E, Maybury B, Colquhoun M, et al. Public Access Defibrillation: Psychological consequences in responders. *Resuscitation* 2008;**77**(2):201-06.
- 25 22. Harrison-Paul R, Timmons S, Schalkwyk WdV. Training lay-people to use automatic external defibrillators: Are all of their needs being met? *Resuscitation* 2006;**71**(1):80-88.
- 26 23. Zijlstra JA, Beesems SG, De Haan RJ, et al. Psychological impact on dispatched local lay rescuers performing bystander cardiopulmonary resuscitation. *Resuscitation* 2015;**92**:115-21.
- 27 24. Peberdy MA, Ottingham LV, Groh WJ, et al. Adverse events associated with lay emergency response programs: the public access defibrillation trial experience. *Resuscitation* 2006;**70**(1):59-65.
- 28 25. Braun V, Clarke V. (Mis)conceptualising themes, thematic analysis, and other problems with Fugard and Potts' (2015) sample-size tool for thematic analysis. *International Journal of Social Research Methodology* 2016;**19**(6):739-43.
- 29
- 30
- 31
- 32
- 33
- 34
- 35
- 36
- 37
- 38
- 39
- 40
- 41
- 42
- 43
- 44
- 45
- 46
- 47
- 48
- 49
- 50
- 51
- 52
- 53
- 54
- 55
- 56
- 57
- 58
- 59
- 60

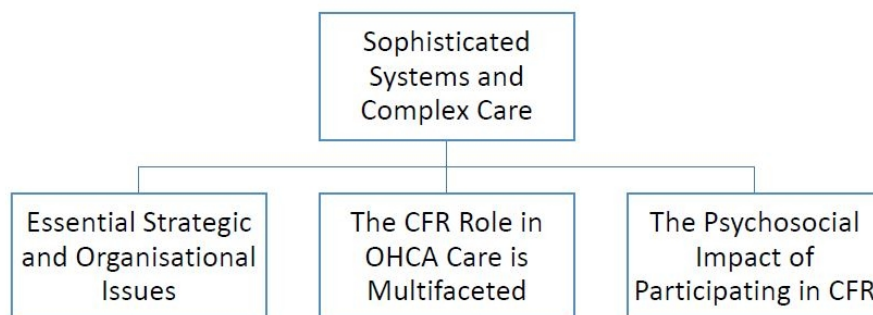

Figure 1

243x105mm (96 x 96 DPI)

## Standards for Reporting Qualitative Research (SRQR)\*

<http://www.equator-network.org/reporting-guidelines/srqr/>

Page/line no(s).

### Title and abstract

|                                                                                                                                                                                                                                                              |       |
|--------------------------------------------------------------------------------------------------------------------------------------------------------------------------------------------------------------------------------------------------------------|-------|
| <p><b>Title</b> - Concise description of the nature and topic of the study Identifying the study as qualitative or indicating the approach (e.g., ethnography, grounded theory) or data collection methods (e.g., interview, focus group) is recommended</p> | Pg. 1 |
| <p><b>Abstract</b> - Summary of key elements of the study using the abstract format of the intended publication; typically includes background, purpose, methods, results, and conclusions</p>                                                               | Pg. 2 |

### Introduction

|                                                                                                                                                                     |       |
|---------------------------------------------------------------------------------------------------------------------------------------------------------------------|-------|
| <p><b>Problem formulation</b> - Description and significance of the problem/phenomenon studied; review of relevant theory and empirical work; problem statement</p> | Pg. 5 |
| <p><b>Purpose or research question</b> - Purpose of the study and specific objectives or questions</p>                                                              | Pg. 2 |

### Methods

|                                                                                                                                                                                                                                                                                                                                                                                                             |       |
|-------------------------------------------------------------------------------------------------------------------------------------------------------------------------------------------------------------------------------------------------------------------------------------------------------------------------------------------------------------------------------------------------------------|-------|
| <p><b>Qualitative approach and research paradigm</b> - Qualitative approach (e.g., ethnography, grounded theory, case study, phenomenology, narrative research) and guiding theory if appropriate; identifying the research paradigm (e.g., postpositivist, constructivist/ interpretivist) is also recommended; rationale**</p>                                                                            | Pg. 6 |
| <p><b>Researcher characteristics and reflexivity</b> - Researchers' characteristics that may influence the research, including personal attributes, qualifications/experience, relationship with participants, assumptions, and/or presuppositions; potential or actual interaction between researchers' characteristics and the research questions, approach, methods, results, and/or transferability</p> | Pg. 6 |
| <p><b>Context</b> - Setting/site and salient contextual factors; rationale**</p>                                                                                                                                                                                                                                                                                                                            | Pg. 6 |
| <p><b>Sampling strategy</b> - How and why research participants, documents, or events were selected; criteria for deciding when no further sampling was necessary (e.g., sampling saturation); rationale**</p>                                                                                                                                                                                              | Pg.6  |
| <p><b>Ethical issues pertaining to human subjects</b> - Documentation of approval by an appropriate ethics review board and participant consent, or explanation for lack thereof; other confidentiality and data security issues</p>                                                                                                                                                                        | Pg. 6 |
| <p><b>Data collection methods</b> - Types of data collected; details of data collection procedures including (as appropriate) start and stop dates of data collection and analysis, iterative process, triangulation of sources/methods, and modification of procedures in response to evolving study findings; rationale**</p>                                                                             | Pg. 7 |

|                       |                                                                                                                                                                                                                                                       |        |
|-----------------------|-------------------------------------------------------------------------------------------------------------------------------------------------------------------------------------------------------------------------------------------------------|--------|
| 1<br>2<br>3<br>4<br>5 | <b>Data collection instruments and technologies</b> - Description of instruments (e.g., interview guides, questionnaires) and devices (e.g., audio recorders) used for data collection; if/how the instrument(s) changed over the course of the study | Pg. 6  |
| 6<br>7<br>8           | <b>Units of study</b> - Number and relevant characteristics of participants, documents, or events included in the study; level of participation (could be reported in results)                                                                        | Pg. 6  |
| 9<br>10<br>11<br>12   | <b>Data processing</b> - Methods for processing data prior to and during analysis, including transcription, data entry, data management and security, verification of data integrity, data coding, and anonymization/de-identification of excerpts    | Pg. 7  |
| 13<br>14<br>15<br>16  | <b>Data analysis</b> - Process by which inferences, themes, etc., were identified and developed, including the researchers involved in data analysis; usually references a specific paradigm or approach; rationale**                                 | Pg. 7  |
| 17<br>18<br>19<br>20  | <b>Techniques to enhance trustworthiness</b> - Techniques to enhance trustworthiness and credibility of data analysis (e.g., member checking, audit trail, triangulation); rationale**                                                                | Pg.6/7 |

## Results/findings

|                      |                                                                                                                                                                                                   |                 |
|----------------------|---------------------------------------------------------------------------------------------------------------------------------------------------------------------------------------------------|-----------------|
| 23<br>24<br>25<br>26 | <b>Synthesis and interpretation</b> - Main findings (e.g., interpretations, inferences, and themes); might include development of a theory or model, or integration with prior research or theory | Pg. 7-12        |
| 27<br>28<br>29       | <b>Links to empirical data</b> - Evidence (e.g., quotes, field notes, text excerpts, photographs) to substantiate analytic findings                                                               | Tables Pg. 9-13 |

## Discussion

|                                  |                                                                                                                                                                                                                                                                                                                                                                                                             |           |
|----------------------------------|-------------------------------------------------------------------------------------------------------------------------------------------------------------------------------------------------------------------------------------------------------------------------------------------------------------------------------------------------------------------------------------------------------------|-----------|
| 32<br>33<br>34<br>35<br>36<br>37 | <b>Integration with prior work, implications, transferability, and contribution(s) to the field</b> - Short summary of main findings; explanation of how findings and conclusions connect to, support, elaborate on, or challenge conclusions of earlier scholarship; discussion of scope of application/generalizability; identification of unique contribution(s) to scholarship in a discipline or field | Pg. 12/13 |
| 38<br>39                         | <b>Limitations</b> - Trustworthiness and limitations of findings                                                                                                                                                                                                                                                                                                                                            | Pg. 14    |

## Other

|                |                                                                                                                                               |          |
|----------------|-----------------------------------------------------------------------------------------------------------------------------------------------|----------|
| 42<br>43<br>44 | <b>Conflicts of interest</b> - Potential sources of influence or perceived influence on study conduct and conclusions; how these were managed | Pg. 14/3 |
| 45<br>46       | <b>Funding</b> - Sources of funding and other support; role of funders in data collection, interpretation, and reporting                      | Pg 3     |

\*The authors created the SRQR by searching the literature to identify guidelines, reporting standards, and critical appraisal criteria for qualitative research; reviewing the reference lists of retrieved sources; and contacting experts to gain feedback. The SRQR aims to improve the transparency of all aspects of qualitative research by providing clear standards for reporting qualitative research.

1  
2  
3  
4  
5  
6  
7  
8  
9  
10  
11  
12  
13  
14  
15  
16  
17  
18  
19  
20  
21  
22  
23  
24  
25  
26  
27  
28  
29  
30  
31  
32  
33  
34  
35  
36  
37  
38  
39  
40  
41  
42  
43  
44  
45  
46  
47  
48  
49  
50  
51  
52  
53  
54  
55  
56  
57  
58  
59  
60

\*\*The rationale should briefly discuss the justification for choosing that theory, approach, method, or technique rather than other options available, the assumptions and limitations implicit in those choices, and how those choices influence study conclusions and transferability. As appropriate, the rationale for several items might be discussed together.

**Reference:**

O'Brien BC, Harris IB, Beckman TJ, Reed DA, Cook DA. **Standards for reporting qualitative research: a synthesis of recommendations.** *Academic Medicine*, Vol. 89, No. 9 / Sept 2014  
DOI: 10.1097/ACM.0000000000000388

For peer review only

# BMJ Open

## Motivation, challenges and realities of volunteer community cardiac arrest response: A qualitative study of 'lay' community first responders

|                                 |                                                                                                                                                                                               |
|---------------------------------|-----------------------------------------------------------------------------------------------------------------------------------------------------------------------------------------------|
| Journal:                        | <i>BMJ Open</i>                                                                                                                                                                               |
| Manuscript ID                   | bmjopen-2019-029015.R2                                                                                                                                                                        |
| Article Type:                   | Research                                                                                                                                                                                      |
| Date Submitted by the Author:   | 16-Apr-2019                                                                                                                                                                                   |
| Complete List of Authors:       | Barry, Tomás ; University College Dublin, School of Medicine; CEMS Guerin, Suzanne; University College Dublin, School of Psychology Bury, Gerard; University College Dublin, General Practice |
| <b>Primary Subject Heading</b>: | Emergency medicine                                                                                                                                                                            |
| Secondary Subject Heading:      | Public health, Qualitative research                                                                                                                                                           |
| Keywords:                       | ACCIDENT & EMERGENCY MEDICINE, EDUCATION & TRAINING (see Medical Education & Training), PUBLIC HEALTH, First Responders, Out-of-Hospital Cardiac Arrest                                       |
|                                 |                                                                                                                                                                                               |

SCHOLARONE™  
Manuscripts



1  
2  
3 **Motivation, challenges and realities of volunteer community cardiac arrest response: A qualitative**  
4 **study of 'lay' community first responders**  
5  
6  
7

8 **Tomas Barry<sup>1</sup>, Suzanne Guerin<sup>2</sup> & Gerard Bury<sup>1</sup>**  
9

- 10  
11  
12 1. UCD Centre for Emergency Medical Science, School of Medicine, Health Sciences  
13 Centre, University College Dublin, Belfield, Dublin 4, Ireland  
14  
15 2. School of Psychology, University College Dublin, Belfield, Dublin 4, Ireland  
16  
17  
18  
19  
20  
21  
22  
23

24 Send correspondence to:

Dr Tomás Barry,

UCD Centre for Emergency Medical Science

School of Medicine,

Health Sciences Centre,

University College Dublin,

Belfield, Dublin 4, Ireland

Tel: +353 (0) 17166693

Email: tomas.barry@ucd.ie

25  
26  
27  
28  
29  
30  
31  
32  
33  
34  
35  
36  
37  
38  
39  
40  
41  
42  
43  
44  
45  
46  
47  
48  
49  
50  
51  
52  
53  
54  
55  
56  
57  
58  
59  
60

1  
2  
3 **Motivation, challenges and realities of volunteer community cardiac arrest response: A qualitative**  
4 **study of 'lay' community first responders**  
5  
6  
7

8 **Abstract**  
9

10  
11  
12 Objectives

13  
14 To explore the reasons why lay community first responders (CFRs) volunteer to participate in out-of-  
15 hospital cardiac arrest response and the realities of their experience in providing this service to the  
16 community.  
17

18 Design

19  
20 A qualitative study, utilising in-depth semi-structured interviews that were recorded and  
21 transcribed. Thematic analysis was undertaken and credibility checks conducted.  
22

23 Setting

24  
25 Nine geographically varied lay CFR schemes throughout the Republic of Ireland.  
26

27 Participants

28  
29 Twelve experienced community first responders.  
30

31 Results

32  
33 CFRs were motivated to participate based on a variety of factors. These included altruistic, social and  
34 pre-existing emergency care interest. A proportion of CFRs may volunteer because of experience of  
35 cardiac arrest or illness in a relative. Sophisticated structures and complex care appear to underpin  
36 CFR involvement in out-of-hospital cardiac arrest. Strategic and organisational issues, multifaceted  
37 cardiac arrest care and the psychosocial impact of participation were considered.  
38

39 Conclusions

40  
41 Health systems that facilitate CFR out-of-hospital cardiac arrest response should consider a variety of  
42 relevant issues. These issues include the suitability of those that volunteer, complexities of  
43 resuscitation/end-of-life care, responder psychological welfare as well as CFRs core role of providing  
44 early basic life support and defibrillation in the community.  
45  
46  
47  
48  
49  
50  
51  
52  
53  
54  
55  
56  
57  
58  
59  
60

### Strengths and limitations of the study

- This is the first study to explore both the reasons CFRs volunteer to provide cardiac arrest response and the realities of CFRs experience in providing this care.
- As a qualitative study this research has facilitated the acquisition of novel data that generates important hypothesis with significant implications for systems that deploy community first responders to cardiac arrest.
- Further research is needed to explore the findings in greater detail and to establish whether the results of this research apply more generally.

### Funding Source

This research was supported by an Irish College of General Practitioners research grant. The funder had no role in data collection, analysis or in the preparation of this manuscript.

### Competing Interests

TB & GB are general practitioners who participate voluntarily in OHCA community response and declare no other conflicts of interest.

SG is an academic researcher with experience of health services research. She has no conflict of interest to declare.

### Ethics and Patient Consent

Ethical approval was granted by the UCD Human Research Ethics committee Ref LS-17-42-Barry and participant informed consent was obtained prior to the commencement of data collection.

### Acknowledgements

The research team acknowledge the assistance of CFR Ireland and Dr David Menzies in planning and carrying out this research.

We would also like to specifically thank the CFRs who participated.

### Author Contributions

TB conceived the study. TB SG & GB contributed to the design of the study. TB acquired the data. TB, SG & GB interpreted and analysed the data. TB drafted the manuscript which was critically revised

1  
2  
3 for important intellectual content by all authors, who approved the final version. TB is guarantor for  
4 the study.  
5  
6  
7

#### 8 **Data Sharing**

9  
10 No additional data available.  
11  
12

13  
14 **Word Count** 4005  
15  
16  
17  
18  
19  
20  
21  
22  
23  
24  
25  
26  
27  
28  
29  
30  
31  
32  
33  
34  
35  
36  
37  
38  
39  
40  
41  
42  
43  
44  
45  
46  
47  
48  
49  
50  
51  
52  
53  
54  
55  
56  
57  
58  
59  
60

For peer review only

1  
2  
3  
4  
5  
6  
7  
8  
9 **Motivation, challenges and realities of volunteer community cardiac arrest response: A qualitative**  
10 **study of 'lay' community first responders**  
11  
12  
13  
14

15  
16 **Main Text**  
17

18  
19 **Introduction**  
20  
21  
22

23 **Background**  
24

25 Approximately 275,000 people are treated for out-of-hospital cardiac arrest (OHCA) in Europe  
26 annually but only one in ten survive<sup>1</sup>. Successful resuscitation is largely determined by the early  
27 availability of CPR (cardio-pulmonary resuscitation) and defibrillation within the community. The  
28 efficacy of these treatments is critically time sensitive<sup>2</sup>. Community first responders (CFRs) are  
29 volunteers who live or work within a community and are organised in a framework which offers OHCA  
30 care in that community to supplement the standard ambulance service response<sup>3</sup>. By virtue of their  
31 presence in the community, CFRs may reach patients earlier than the statutory ambulance service and  
32 thus shorten the collapse to CPR/defibrillation interval. The role of OHCA CFR is thus to provide early  
33 basic life support care involving CPR and Defibrillation. International research has demonstrated that  
34 CFRs can play a significant role in early CPR, defibrillation and potentially OHCA survival<sup>4-7</sup>.  
35  
36

37  
38 Ireland has a population of 4.7 million<sup>8</sup>. Approximately 2000 OHCA where resuscitation is attempted  
39 are dealt with by the Irish ambulance services annually; although survival is rising, it remains in the  
40 region of seven percent<sup>9</sup>. One third of Ireland's population live in rural areas<sup>9</sup>. Only nine percent of  
41 rural Irish OHCA patients receive a statutory ambulance response within the national target timeframe  
42 of eight minutes or less; ultimately rural OHCA patients are less likely to be discharged alive from  
43 hospital<sup>10</sup>. Given Ireland's settlement pattern, the deployment of CFRs to OHCA has been embraced  
44 as a key public health response to OHCA and CFR schemes have been developed both in urban and  
45 rural areas. In Ireland, CFRs are volunteers who are activated by text message alert from the statutory  
46 ambulance service. CFR categories include off duty ambulance service staff, fire service CFRs, family  
47 doctors and lay CFR groups<sup>11</sup>. This study focuses on lay CFR groups. Several dozen people may join any  
48 individual group. Although groups do not have professional medical responsibilities, off duty  
49 healthcare staff sometimes also join and contribute as volunteers. Where off duty healthcare staff  
50 operate in lay CFR groups their scope of practice is restricted to that of other lay CFRs. Accreditation  
51 occurs through the National Ambulance Service and CFRs 'go live' when training, equipment,  
52 activation and support structures are in place. Most lay CFR groups operate by having a roster of two-  
53 person teams who carry a dedicated alert phone, defibrillator and basic life support equipment to  
54 cover defined periods for their area. When an alert is received, the CFR(s) respond using normal  
55 driving rules.  
56  
57  
58  
59

60 **Importance**

1  
2  
3 Despite the observation that CFRs are established as a key element of OHCA response in Ireland and  
4 over 500 individual response schemes (including approximately 200 lay CFR groups) are now in place,  
5 virtually no data are available concerning CFR activities. Research in this area is urgently required.  
6

7 The involvement of lay CFRs in OHCA resuscitation is unique in terms of a healthcare systems response  
8 to a life threatening emergency situation. It is not without risk. It involves the deployment of  
9 volunteers with minimal training to the most high acuity medical situations in their own communities  
10 and has raised potential concerns in terms of professional gatekeeping, training and supervision<sup>5</sup>.  
11 Furthermore, with an incidence rate in Ireland of 50 per 100,000 population per year, OHCA is likely  
12 to be a rare event for individual CFR schemes especially in rural communities<sup>9</sup>. Ultimately the  
13 engagement of CFRs will need to be sustained over time. Despite the observation that CFR deployment  
14 has emerged as an increasingly common OHCA intervention internationally and is being embraced by  
15 various EMS systems, very little research has been carried out to explore the motivation, experience  
16 or perceptions of this key group of people.  
17  
18  
19

### 20 Goals of This Investigation

21  
22 The aim of this study is to explore the reasons why lay CFRs volunteer to participate in OHCA response  
23 and the realities of their experience in providing this service to the community.  
24  
25  
26

## 27 **Methods**

### 28 29 30 31 Study design and setting

32 A qualitative study, utilising in-depth semi-structured interviews followed by thematic analysis was  
33 undertaken. The study setting was geographically distributed lay CFR groups, both rural and urban  
34 throughout Ireland. The type of qualitative approach employed was phenomenological; the research  
35 process focused on understanding the participant's view of self and their surrounding world in the  
36 specific context of OHCA response<sup>12</sup>. The methodological approach was informed by the standards for  
37 reporting of qualitative research outlined by O'Brien et al 2014<sup>13</sup> and the analytic approach outlined  
38 by Braun & Clarke 2008<sup>14</sup>. Steps to ensure credibility in the analysis process were also conducted and  
39 are described below. Ethical approval was granted by the UCD Human Research Ethics committee (Ref  
40 LS-17-42-Barry) and participant informed consent was obtained prior to the commencement of data  
41 collection.  
42  
43  
44  
45

### 46 47 Selection of Participants'

48 A purposive approach to sampling was undertaken, with recruitment through Irelands dedicated CFR  
49 network (CFR Ireland). In order to gain a spread of perspectives and experience the research team  
50 specifically requested that CFR Ireland help recruit 'twelve CFRs with experience of OHCA response  
51 from four different geographical areas'. All CFRs dispatched by the ambulance service in Ireland have  
52 undergone at minimum, a specific half day training course in basic life support and AED use. In addition  
53 each participant was required to have personal experience of responding to cardiac arrest in the  
54 community. No specific incentive or reward for participation was offered beyond highlighting the  
55 value of contributing to increased understanding of this scientific field. A study information leaflet was  
56 provided to each participant prior to enrolment. In advance of the study we considered the potential  
57 that topics discussed might be distressing for participants and it was made clear that participants were  
58  
59  
60

1  
2  
3 free to pass on any topics they found uncomfortable. Provisions were made to refer participants to  
4 their own family doctor if distress was experienced from participation in the study.  
5

#### 6 Data Collection 7

8 One researcher (TB) conducted all interviews, which were face to face and took place at various  
9 locations convenient for the relevant CFR(s). Interviews took place between September and December  
10 2017. Prior to conducting interviews TB & SG (an experienced qualitative researcher) formally planned  
11 the interview process; potential biases were considered via a reflective process and a formal reflexivity  
12 statement was composed. The researcher (TB) aimed to identify any personal biases that might affect  
13 the research process or results.  
14  
15

16 *The observation that the researcher came from the 'world view perspective' of a doctor who himself*  
17 *participated in cardiac arrest response was considered in detail at this stage. Via a personal reflexivity*  
18 *statement, the researcher attempted to consider any pre-existing biases he might possess related to*  
19 *the factors that motivate CFRs to participate in OHCA care and the nature of CFR OHCA care. The*  
20 *researcher reflected on any previous interactions with CFRs and attempted to consider and make*  
21 *explicit any pre-formed perspectives in an effort to limit how personal bias might influence the research*  
22 *process.*  
23  
24

25 A semi-structured interview format was undertaken to allow flexibility of response and follow up  
26 'unplanned' questions to facilitate a participant led exploration of topics<sup>12</sup>. This approach involved a  
27 pre-prepared interview guide/schedule to facilitate overall structure but did not require rigid  
28 adherence to precise wording of questions or the order in which they were asked<sup>15</sup>. The written  
29 interview schedule considered two key domains; 1) the participant's motivation to participate in the  
30 scheme and 2) the realities of providing first response to cardiac arrest in the community. Each domain  
31 involved standard initial open ended 'prompt' questions and flexible 'follow on' questions based on  
32 the interviewees' initial responses. Informed written and verbal consent were obtained before  
33 commencing each interview. The initial interview acted as a pilot where the candidate was asked to  
34 give feedback and suggestions regarding the interview process. Immediately following each other  
35 interview reflections concerning interview process and content were recorded as field notes in a  
36 research diary. All interviews were recorded using a Zoom H2n professional grade recorder and later  
37 professionally transcribed. The transcripts were then checked against the tapes for accuracy and  
38 minor corrections were made as necessary.  
39  
40  
41  
42

#### 43 Data Analysis 44

45 Data were analysed using the thematic analysis framework outlined by Braun and Clarke<sup>14</sup>. Thematic  
46 analysis is a method for identifying, analysing and reporting themes within data. It involves six phases;  
47 'Data familiarisation', 'Generating initial codes', 'Searching for themes', 'Reviewing themes', 'Defining  
48 and naming themes' and 'Producing a report'. Initial coding and all further phases were conducted  
49 using NVIVO 11 for Windows. An experienced qualitative researcher (SG) acted as co-researcher at all  
50 stages of the analytic process to ensure credibility. SG coded a sample of the dataset (one interview)  
51 independently and reviewed all candidate and final worked out themes with TB thus supporting a  
52 reflexive process throughout data analysis. The analysis produced a structure of themes in relation to  
53 key domains that reflect the focus of the study.  
54  
55  
56  
57

#### 58 Patient and Public Involvement 59

60 Neither patients nor the public were involved in the design or conduct of this research.

## Results

### Characteristics of the study subjects

CFR Ireland contacted fifteen geographically disparate CFR groups on behalf of the research team. Selection of groups was a matter for CFR Ireland who reported to the research team that they '*selected groups and individuals based on urban or rural, large or small, very busy or not so busy, gender mix and attempting to give a national spread.*' CFR Ireland reported they '*contacted 15 groups to increase the likelihood of ultimately a good spread of 12 different CFRs.*' Where a group expressed interest, permission was obtained for the research team to contact a nominated person from that relevant group directly. Twelve groups offered permission, two of whom were identified as new groups unlikely to have yet participated in a cardiac arrest response and thus were excluded from the study.

Ultimately nine of the remaining ten groups participated in the research. Twelve CFRs of varying ages and representing those nine geographically distributed lay CFR groups self-selected to participate. Given the sensitivity of the topic area detailed demographic participant elements were not profiled quantitatively, however all participants described significant experience of OHCA response over a number of years. A total of ten in-depth interviews were conducted; on two occasions, two CFRs representing a single CFR group chose to be interviewed together. Two further participants interviewed were from one individual CFR group. All interviews were included in data analysis. Gender was equally distributed among participants. Most participants occupied a senior role within their respective CFR group by virtue of the fact that they had additional responsibility for the co-ordination or day to day running of their CFR scheme in addition to providing OHCA response. Two participants had a professional healthcare background. Interview duration ranged from 45 to 108 minutes, median duration was 58 minutes. No participants elected to 'pass' on any topics raised in the interviews and no psychosocial distress was reported related to participating in the study.

### Main Results

#### Domain (1): Motivation to participate

The results of thematic analysis considering the domain of 'motivation to participate' are reported in Table 1. Participants outlined that some CFRs were motivated to volunteer by an interest in emergency care. Some CFRs worked as healthcare professionals although this could be challenging as the extra burden of knowledge could distract from the core basic life support tasks of a CFR. CFRs were also motivated to participate based on a desire to give back to the community or as a means of social engagement. The inherent satisfaction in 'saving a life' was also highlighted. A proportion of CFRs were motivated to volunteer based on past experience of OHCA incidents. For some, this was a response to having felt unprepared and unskilled in such a situation. For others the desire to volunteer related to a family experience of illness or OHCA. Although many such volunteers were considered to cope well psychologically with the CFR role, respondents noted that for some individuals engaging in CFR activities was known to have caused psychological distress. A minority population of those that volunteer appeared to be motivated by the dramatic elements of emergency care. One participant termed this group 'Blue Light Junkies'. Most participants appeared to have an awareness of this



volunteer type and some considered their attributes to be incompatible with the calm affect and strong interpersonal skills considered necessary for the CFR role.

Table 1: Motivation to participate, Key Themes

| Theme                               | Theme Description                                                                                                                                                                                                                             | Illustrative Quote(s)                                                                                                                                                                                                                                                          |
|-------------------------------------|-----------------------------------------------------------------------------------------------------------------------------------------------------------------------------------------------------------------------------------------------|--------------------------------------------------------------------------------------------------------------------------------------------------------------------------------------------------------------------------------------------------------------------------------|
| Existing skills and interest        | Volunteer CFRs may already have an interest in emergency care, be healthcare professionals or come with first aid training. CFR activity might also be a means by which a lay person with an interest in healthcare can pursue this interest. | <i>CFR10: What we found is, it tends to be people who have some sort of a first aid background already that do it. So a lot of the people that joined us initially would have been the first aider in their rugby club, or the first aider in work, or something like that</i> |
| Giving back to the community        | CFR was seen as a means of doing something good for and giving back to the 'community', thus resulting in personal satisfaction.                                                                                                              | <i>CFR9: Like that you're there, you're involved, giving something back, but it's for free, it's voluntary. It's brilliant, you know</i>                                                                                                                                       |
| Getting involved with the community | Participation in CFR could be a means of engaging with the community and making social contacts.                                                                                                                                              | <i>CFR6: I could never give back what I got out of the scheme, could never, after 12 years. I could never repay what I've got. I've met some of the...some of my closest friends now, through the scheme</i>                                                                   |
| Saving a life                       | Participation in CFR offered the potential to 'save a life'. This had inherent personal satisfaction.                                                                                                                                         | <i>CFR9: But for like the good ones where it's an arrest you get there, you shock them, they're back and discharged back home. Like there's no better feeling than actually being involved with that</i>                                                                       |

|                             |                                                                                                                                                                                                                                                         |                                                                                                                                                                                                                                                                                                                                                                                                                                                                                                                                                                                                 |
|-----------------------------|---------------------------------------------------------------------------------------------------------------------------------------------------------------------------------------------------------------------------------------------------------|-------------------------------------------------------------------------------------------------------------------------------------------------------------------------------------------------------------------------------------------------------------------------------------------------------------------------------------------------------------------------------------------------------------------------------------------------------------------------------------------------------------------------------------------------------------------------------------------------|
| Personal experience of OHCA | Personal experience of OHCA was a potential motivator. This could involve a situation where a volunteer had encountered OHCA and felt helpless/was left with a feeling of needing to act on this. It could also involve family members of OHCA victims. | <i>CFR8: Well for me personally it was an incident I witnessed in a shopping centre... So unfortunately for the man, I suppose for everyone involved, the man died and passed away and I felt very helpless and I kept saying 'God this is tragic, because nobody knew what to do. We just stood around.' And I said 'Look, I hope I'll never feel like this again. I'm going to learn.'</i> <i>CFR1: A cohort have family issues, as in, something happened, or they have a child who maybe has cardiac problems, etcetera. That, I might come back to that later, that can be challenging</i> |
| 'Blue Light Junkies'        | A minority of individuals can be motivated to participate based on a desire to engage with elements of OHCA response that are perceived as exciting or dramatic.                                                                                        | <i>CFR2: Yeah, I think some people probably have the, what do we refer to it is. I can't think actually the name we use, but basically they want to be Superman and they want to rush in and save people's lives and they're only dying to paint 'battenbergs' on the side of their cars and get blue lights – which obviously you're not allowed to do – but there is that element, that some of the people in the room, it's a real gung-ho macho kind of a thing</i>                                                                                                                         |

### Domain (2): The realities of providing first response to cardiac arrest in the community

A thematic map considering the domain of 'the realities of providing first response to cardiac arrest in the community' is shown in figure 1. A unifying overall umbrella theme was evident reflecting the observation that the systems underpinning CFR care are sophisticated and the care provided is complex. Three key follow-on themes were evident: 'essential strategic and organisational issues', 'the CFR role in OHCA is multifaceted' and the 'psychosocial impact of participating in CFR'. A number of follow on sub-themes were also apparent and are described below.

Fig 1: Thematic Map - Realities of providing first response to cardiac arrest in the community.

\*\*\*Figure 1 here please\*\*\*

The first key theme 'essential strategic and organisational issues' is reported in table 2, with sub-themes identified by respondents. Participants highlighted the importance of community engagement, fundraising and cascading basic life support to the community. There was recognition that although not everyone might be suitable for the CFR role there were various other 'support' roles available to those wishing to volunteer. There was evidence that CFR groups had developed processes of screening and supported induction for new members. The voluntary/ community nature of the scheme was considered to pose challenges in terms of group dynamics and conflict. The importance of training for the role of CFR was highlighted. Anxieties in terms of locating patients in OHCA quickly were discussed as was the value of smartphone mapping and 'eircodes' (postcodes) in expediting this process. Safe driving was an evident priority. There were conflicting perspectives on CFR scope of practice. In general, CFR interactions with ambulance services management were considered positive however there was some frustration evident around a lack of financial support, and a perceived high level of caution on the part of health services management around CFR activities.

Table 2. Key theme 'Essential strategic and organisational issues' with sub-themes

| Sub-Theme            | Sub-Theme Description                                                                                                          | Illustrative Quote(s)                                                                                                                                                                                                                                                                                                                                                 |
|----------------------|--------------------------------------------------------------------------------------------------------------------------------|-----------------------------------------------------------------------------------------------------------------------------------------------------------------------------------------------------------------------------------------------------------------------------------------------------------------------------------------------------------------------|
| Community engagement | Community engagement was important for recruitment, fundraising and cascading basic life support skills/AEDs to the community. | <i>CFR5: When we're training we actually go out into the community like. Housing estates, the kids are fantastic, once they see something different going on they are like that. The word spreads so then we have a crowd. So, yes, so it is basically from being out around in the community doing different demonstrations, fundraising, all that kind of stuff</i> |

|                                                                           |                                                                                                                                                                                                                                                          |                                                                                                                                                                                                                                                                                                                                                                                                                                                                                                                                                                                                                                                                                                                                                                            |
|---------------------------------------------------------------------------|----------------------------------------------------------------------------------------------------------------------------------------------------------------------------------------------------------------------------------------------------------|----------------------------------------------------------------------------------------------------------------------------------------------------------------------------------------------------------------------------------------------------------------------------------------------------------------------------------------------------------------------------------------------------------------------------------------------------------------------------------------------------------------------------------------------------------------------------------------------------------------------------------------------------------------------------------------------------------------------------------------------------------------------------|
| <p>Recruitment, screening and potential for different volunteer roles</p> | <p>Ongoing recruitment was important. Screening was important as not everyone is suitable for the CFR role but it is also not possible to exclude individuals as a community organisation. A variety of additional roles outside of responder exist.</p> | <p><i>CFR1: We have had a couple of situations where (people) appear to have come and done the training to get it on their CV, and then never shown up again. The other piece is, it's very much, we do need to see whether they are 'a fit' in terms of going into somebody's house in a very sensitive situation, we need to work out, A, have they got the skills, and B, have they got... more the people skills and the appropriateness skills. So we don't rush them in</i></p> <p><i>CFR2: I mean most of the people are very competent but there are people there that I just wouldn't be 100% sure of. But unfortunately, in a community group, you know, unless I think somebody is actually dangerous, we're not in a position to tell them to go away.</i></p> |
| <p>Supporting new members</p>                                             | <p>Supported induction was important.</p>                                                                                                                                                                                                                | <p><i>CFR3: When anyone (is) first kind of qualified they're told you can only go if responder A is on and you're responder B and only if they're going because it's not good for you to be going on your own for the first few calls.</i></p>                                                                                                                                                                                                                                                                                                                                                                                                                                                                                                                             |
| <p>Training</p>                                                           | <p>Ongoing training was important.</p>                                                                                                                                                                                                                   | <p><i>CFR4: We train twice a month now, you know. And we change all the scenarios and that we sit down and have discussions about - as to how did our last call go? Is there something else that maybe you should have done when you think back on it? Or what difficulties did you have on that call?</i></p>                                                                                                                                                                                                                                                                                                                                                                                                                                                             |
| <p>Dispatch</p>                                                           | <p>Time pressures exist in locating the patient in OHCA. Potential technological solutions such as smart phone mapping were used. Safe driving was a priority.</p>                                                                                       | <p><i>CFR1: I think the anxiety about getting there. I suppose the biggest anxiety for the volunteers is, will I be able to find the house. That is the thing that keeps them awake at night.</i></p> <p><i>CFR10: Google Maps is the answer to pretty much everything</i></p> <p><i>CFR3: So you have to remain calm, you have to abide by the rules of the road, obviously, and that can be a bit stressful if you hit traffic but you just have to. You just have to say to yourself I'm just doing my best and the ambulance is on its way anyways</i></p>                                                                                                                                                                                                             |
| <p>Group dynamics and conflict</p>                                        | <p>The voluntary nature of community groups was highlighted as a challenge in terms of group conflict and cohesion.</p>                                                                                                                                  | <p><i>CFR3: And, as with all volunteer groups, there will be issues thrown up. I know one person did leave because she didn't feel welcomed or something, now I think that was probably on her side a bit. So there's going to be issues like that with any group of volunteers</i></p>                                                                                                                                                                                                                                                                                                                                                                                                                                                                                    |

|                                                    |                                                                                                                                                                                                                                              |                                                                                                                                                                                                                                                                                                                                                                                                                                                                                                                                                                                                                                                                                                                                                                                                                                                  |
|----------------------------------------------------|----------------------------------------------------------------------------------------------------------------------------------------------------------------------------------------------------------------------------------------------|--------------------------------------------------------------------------------------------------------------------------------------------------------------------------------------------------------------------------------------------------------------------------------------------------------------------------------------------------------------------------------------------------------------------------------------------------------------------------------------------------------------------------------------------------------------------------------------------------------------------------------------------------------------------------------------------------------------------------------------------------------------------------------------------------------------------------------------------------|
| Scope of practice                                  | Conflicting opinions existed re CFR scope of practice; some believed 'best to stick to the basics' while others want to do more.                                                                                                             | <p><i>CFR12: I keep saying to my guys, our guys, 'Get this right first and then we might give a look at something else', ... but definitely I wouldn't be that keen to broaden the range. I don't see our guys really behaving themselves and concentrating on their skill level</i></p> <p><i>CFR4: We've a paramedic on board but we're not allowed to use oxygen. There's loads of things that we can't do that we're trained in doing, you know. Then there's new drugs coming in that, has got the licence to you know certify us in administrating these drugs and that and we're not even allowed to use this.</i></p>                                                                                                                                                                                                                    |
| Support & friction at the health service interface | Key health services individuals and structures were considered to support CFR however limited financial support was available. At times some frustration with what was perceived as an overly cautious health services approach was evident. | <p><i>CFR1: So ('X') is the CFR coordinator when there was nobody doing anything, and they have been brilliant. So we had to work it all out, the policies weren't in place at the time, they're... now the policy is excellent. Whoever wrote it, seemed to cover every base, and I know it's being updated currently.</i></p> <p><i>CFR12: It's not easy sometimes dealing with the HSE. They wouldn't be too quick to change or make up their minds about stuff. Or at the same time we'd be looking at well our neighbours are dying, and you can't make your mind up, so we figure stuff out. They're very fearful that there's information out there but it's out there anyway, so I think they're fearful of making a mistake. I think for me looking at it from a non-HSE employee, they'd rather do nothing than make a mistake</i></p> |

The second parent theme 'the CFR role in OHCA care is multifaceted' is reported in table 3. A variety of CFR roles in OHCA care were highlighted ranging from providing early BLS care in advance of the ambulance service, assisting the ambulance service on their arrival and the provision of psychosocial support for families. As the 'first responders' to OHCA, CFRs had the potential to encounter challenging situations around end of life care. Difficulties around 'do not resuscitate' directives and conflicting family perspectives on the appropriateness of resuscitation were discussed. CFRs strongly valued being involved in the care process by paramedics. A minority of paramedics were perceived as having negative attitudes toward CFRs possibly because of a perspective that CFRs were undermining the paramedic role by providing a low cost alternative. The provision of psychosocial support to families was perceived as routine, important and in fact a significant overall proportion of the care CFRs provided in OHCA.

Table 3. 'The CFR role in OHCA care is multifaceted'

| Sub-Theme                 | Sub-Theme Description                                                                                                                                                                                                                       | Illustrative Quote(s)                                                                                                                                                                                                                                                                                                                                                                                                                                                                                                                                                                                 |
|---------------------------|---------------------------------------------------------------------------------------------------------------------------------------------------------------------------------------------------------------------------------------------|-------------------------------------------------------------------------------------------------------------------------------------------------------------------------------------------------------------------------------------------------------------------------------------------------------------------------------------------------------------------------------------------------------------------------------------------------------------------------------------------------------------------------------------------------------------------------------------------------------|
| Providing early BLS       | The provision of early BLS was of fundamental importance. Complex end of life situations could be encountered but the BLS element of care was considered straightforward.                                                                   | <i>CFR6: Look it, although it's stressful and it's very difficult, the calls you will go on will be very difficult, but what we have to do is very simple, it's very straightforward - CPR and use a defibrillator, nothing else matters</i>                                                                                                                                                                                                                                                                                                                                                          |
| Dilemmas                  | As 'first to respond' CFRs could encounter situations where difficult decisions had to be made in terms of what actions were appropriate.                                                                                                   | <i>CFR2: We'd one person in particular whose family absolutely wanted CPR done and the nurse was saying look, he's not well... and they insisted, so we did it but ...It raises big moral issues for me</i>                                                                                                                                                                                                                                                                                                                                                                                           |
| Assisting ambulance staff | CFRs were happy to assist ambulance staff as necessary and appreciated when paramedics involved them in the care process. Relationships with paramedics were mostly positive but a minority of paramedics appeared to view CFRs negatively. | <i>CFR11: I have gone in the back of the ambulance doing the breaths the whole way to the hospital, it was brilliant, absolutely brilliant but for the lads to let me do that, you know?<br/>CFR3: And we get quite a few who are quite rude and not happy to see us there, I'll be honest. But I would say it's actually only 5% but you're so almost offended by them...I would say if you were starting out as a first responder on your first few calls and you came across some of the guys that we've come across, you might be thinking, you know, what's the point in me coming out here.</i> |
| Caring for families       | Providing psychosocial support to patient's families was considered a definite and significant component of the care CFRs provide. Providing this aspect of care was satisfying for CFRs.                                                   | <i>CFR2: Their loved one has just died and they're there on their own, you know. So, it is very much a social, there's a huge social care element to it and it's something I constantly emphasise to people when they're talking about joining is that the saving a life bit will happen once in a blue moon. That really what this is about is being there, that we are there with the people as opposed to them being scared and in pain and on their own.</i>                                                                                                                                      |

The final key theme 'the psychosocial impact of participating in CFR' is reported in table 4. Participating in CFR had the potential to affect volunteers in a number of ways. For some the burden of being "on call" had been a challenge in terms of a sense of hyperarousal in anticipation of an alert. Participation

in CFR could at times result in exposure to emotionally traumatic situations and there was evidence that such situations had affected CFRs in their aftermath. For some, the interaction with family members at an OHCA event had resulted in changed relationships and social avoidance going forward. CFR wellbeing was a key issue for participants, who expressed a sense of personal responsibility for this element of participation. Internal debrief in the immediate aftermath of an incident was frequently employed as a coping strategy. Formal CFR supports such as critical incident stress management (CISM) were evident and highly valued by participants.

Table 4. 'The psychosocial impact of participating in CFR'

| Sub-Theme                                | Sub-Theme Description                                                                                                                                  | Illustrative Quote(s)                                                                                                                                                                                                                                                                                                                                                                                                                                                                                                                                                                                                                           |
|------------------------------------------|--------------------------------------------------------------------------------------------------------------------------------------------------------|-------------------------------------------------------------------------------------------------------------------------------------------------------------------------------------------------------------------------------------------------------------------------------------------------------------------------------------------------------------------------------------------------------------------------------------------------------------------------------------------------------------------------------------------------------------------------------------------------------------------------------------------------|
| The burden of being 'on-call'            | Being 'on call' could be burdensome for a proportion of CFRs. CFRs could perceive a duty to provide cover and a sense of guilt when unable to respond. | <i>CFR: He had said he was just finding it more and more and more playing on his mind. The phone, not calls that he was on, he was just more conscious that he was on call. So if he couldn't take it at night, because he was waiting for it to ring</i><br><i>CFR8: I found it a little bit of a burden at times, in that, but I was trying to cover too much and then I realised you just can't slot into every vacant slot</i>                                                                                                                                                                                                              |
| Difficult and distressing situations     | CFRs were exposed to difficult situations that could have significant psychological effects in their aftermath.                                        | <i>CFR10: It was a horrible experience, in terms of, you could hear screaming as you were approaching the driveway... it was like walking into a little horror film.</i><br><i>CFR12: And it was just dreadful what she had to endure and she happened to be on her own, she was the first on the scene. She happened to be on her own, but for me I probably wouldn't have gone in but she did. Fair play to her she went in and ...they were in bits. There was sadness, there was anger, there was fighting, there was everything. Everything thrown at her. Dreadful and it took a long time to get over it and she is still responding</i> |
| Changed relationships with the community | Providing CFR care could result in changed relationships with members of the community.                                                                | <i>CFR7: People do actually avoid you. And when it was actually said to me, they're not actually avoiding you, they're avoiding the flashbacks because when they, the last time they seen you. It brings back the memories of the last time. Well hang on, the last time I seen "X" he was on top of my mother pumping on her chest and blowing into her mouth. And all the flashbacks come back</i>                                                                                                                                                                                                                                            |

|                                  |                                                                                                                                                                   |                                                                                                                                                                                                                                                                                                                                                                                                                                                                                                                                                                                                                          |
|----------------------------------|-------------------------------------------------------------------------------------------------------------------------------------------------------------------|--------------------------------------------------------------------------------------------------------------------------------------------------------------------------------------------------------------------------------------------------------------------------------------------------------------------------------------------------------------------------------------------------------------------------------------------------------------------------------------------------------------------------------------------------------------------------------------------------------------------------|
| Volunteer wellbeing and supports | CFR wellbeing was a priority for CFR groups. Debrief and formal health services support in the form of CISM (critical incident stress management) were important. | <p><i>CFR4: It's very important when you stay in contact with all your members and find out their welfare. Because as a coordinator within a unit, it's your responsibility to make sure that all your members are safe, you know. CFR5: We have had some bad callouts but like I said we go back to the house and put the kettle on and we just go through the whole scene and just make sure everyone is alright, how are they feeling, you know</i></p> <p><i>CFR1: The CISM training is very good, it's the awareness piece. And I have to say that CISM sessions at the CFR conferences have been excellent</i></p> |
|----------------------------------|-------------------------------------------------------------------------------------------------------------------------------------------------------------------|--------------------------------------------------------------------------------------------------------------------------------------------------------------------------------------------------------------------------------------------------------------------------------------------------------------------------------------------------------------------------------------------------------------------------------------------------------------------------------------------------------------------------------------------------------------------------------------------------------------------------|

### Discussion

The deployment of lay CFRs to OHCA represents a key mechanism by which early CPR and defibrillation can be made available in the community, which in the context of the current evidence base surrounding OHCA resuscitation is the priority<sup>16</sup>. Where CFRs can reach OHCA patients quickly, increased rates of survival can be achieved<sup>17</sup>. It is thus unsurprising that the narrative of CFR care has to date focused on the provision of early CPR and defibrillation. However, this study shows that CFR care has evolved to be a sophisticated entity that includes complex decision making, a significant component dedicated to the provision of psychosocial support for bystanders and family members and also teamwork with ambulance service staff during ongoing resuscitation. It is striking that participants raised complex moral and psychological sub-themes as well as the ongoing welfare both of CFR volunteers and the families of OHCA patients in their communities. These issues highlight the need for a broad preparation and longer-term support for the CFR role. A focus on CPR skills and driving safety may have been perceived as the critical components of the role in the past but the material gleaned in this study show that those who arrive first at the scene of an OHCA can be confronted with the need to make complex decisions immediately and under pressure. Preparation for that decision making process and support in dealing with its consequences are familiar themes in professional advanced life-support resuscitation training – this study highlights their relevance for CFR volunteers also. When lay volunteers arrive at a home in which family members are conflicted about providing resuscitation to a loved one, immediate practical, moral and personal challenges arise, few of which have procedures-driven responses. The personal qualities and preparation of the CFR volunteers are the attributes which come into play in such scenarios according to study respondents. Those attributes may need to be more strongly 'screened for' and supported among volunteers.

Complexity emerges from this study as a significant finding. While CPR and defibrillation are noted by respondents to be straightforward skills, the personal and systems issues associated with the role are highly complex; respondents identify many issues which may be familiar within medical, nursing and paramedic training but which have received limited attention within 'volunteer' roles. In further developing the number and perhaps scope of new CFR schemes, the accreditation and support agencies should consider how best to address these demands.

Many of the factors that motivated CFRs in our study (prior relevant experience, a sense of altruism and the desire to engage with and make a contribution to the community) have been described



1  
2  
3 previously<sup>18-21</sup>. The issue of close personal experience of OHCA or illness in a family member as a  
4 motivator is worthy of consideration, given the possibility of associated psychological distress.  
5 Sustained CFR participation may be related to the nature of CFR interaction with paramedics.  
6 Strategies that promote positive interactions (such as involving CFRs in the care process as appropriate  
7 and educating paramedics as to the role of CFRs) could be employed by ambulance services as a  
8 mechanism to formerly support CFR retention. The volunteer phenotype described by one participant  
9 as 'blue light junkies' has not to our knowledge been previously described in the CFR literature.  
10 Participants expressed conflicting views as to whether such individuals possessed the necessary  
11 attributes for competent CFR care. The issue of 'problematic individuals' highlights an entity unique  
12 to voluntary and community organisations providing healthcare services. In contrast, professional  
13 services have a mandate and mechanism to exclude individuals considered unsuitable for the role.  
14  
15  
16

17 Concerns as to the psychological impact of participation in CFR have been highlighted in the  
18 literature<sup>18 19 22</sup>. Previous studies have however suggested that the incidence of significant prolonged  
19 adverse effects are likely to be low<sup>23 24</sup>. Participants in our study highlighted the psychologically  
20 challenging situations faced by CFRs and the importance of CFR wellbeing. This issue was actively  
21 managed by processes of volunteer screening, training, supported induction, debrief and CISM. CFRs  
22 who continue in the role may do so as a direct result of such mechanisms. Such individuals may also  
23 exhibit a resilience phenomenon<sup>21</sup>. It is however also possible that those who discontinue  
24 participation have suffered psychological ill effects. In evaluating the potential adverse effects of  
25 dispatching CFRs to OHCA such a population are likely to be of critical relevance but difficult to follow.  
26  
27  
28  
29  
30

### 31 Limitations

32 Our study has important limitations that should be considered when interpreting its results. The  
33 number of participants interviewed balanced the requirement for rich data acquisition with the  
34 pragmatic issue of conducting multiple in-depth face to face interviews at varied geographical  
35 locations. We adopted the approach to sampling advocated by Braun and Clarke who do not suggest  
36 the application of the principle of 'data saturation' in sample size calculation but instead highlight the  
37 exploratory and interpretative ethos of thematic analysis and the requirement to offer a compelling  
38 and coherent analysis of the data by doing justice to its complexity and the nuance contained within  
39 it<sup>14 15 25</sup>. Ultimately our analysis produced an evolved structure of themes in relation to key domains  
40 that reflect the focus of the study and its research questions. Rich data was acquired from twelve  
41 participants that generated novel findings and important hypothesis with significant potential  
42 implications for all health systems that dispatch CFRs to OHCA. Further research is ultimately needed  
43 to explore significant individual themes in greater depth and to establish whether the findings of this  
44 research apply more generally. Further qualitative research guided by the themes identified in this  
45 study as well as quantitative national and international surveys of CFRs should now be considered.  
46  
47  
48  
49

50 Although the semi-structured interview is a flexible and adaptable way of generating findings, the lack  
51 of standardisation can raise concerns about reliability and biases are ultimately difficult to rule out<sup>12</sup>.  
52 The fact that participants were recruited via CFR Ireland and self-selected to participate could result  
53 in selection bias. This strategy did however provide a sample of experienced CFRs, many of whom had  
54 strategic roles within their organisations and ultimately facilitated significant depth of topic  
55 exploration and the development of a breadth of evolved themes at data analysis. The observation  
56 that the study participants all had significant experience of OHCA response and had senior roles within  
57 their individual schemes warrants some consideration. Individuals new to CFR or with less experience  
58 of providing clinical care may have different perspectives.  
59  
60

1  
2  
3 One participant was known to the interviewer prior to the research thus potentially introducing bias  
4 in the topics discussed. The participant in question was however recruited via the standard process  
5 via CFR Ireland and in their capacity as lay CFR. Two healthcare professionals also participated in this  
6 research. Both were recruited via the mechanisms already described and in their capacity as lay CFR  
7 rather than healthcare professional. Their healthcare professional perspectives may have introduced  
8 bias however it is also possible that their inclusion reflects a phenomenon where healthcare  
9 professionals participate in varied capacities in lay CFR schemes. This interface of health professional  
10 and lay CFR was not explored in detail in this study and may warrant further consideration. It may  
11 have specific relevance in light of the complexity of the CFR role and formalising appropriate supports  
12 for CFRs in managing challenging clinical circumstances with psychosocial impacts.  
13  
14  
15

16 Thematic analysis was selected as the methodological approach for this study based on its accessibility  
17 as a qualitative research approach and its flexibility in terms of theoretical framework<sup>15</sup>. Such flexibility  
18 was considered necessary in order to facilitate a bottom up inductive analysis of the participant data,  
19 in the context of a researcher who possessed an inherent disciplinary and 'insider' standpoint. It is  
20 possible that this perspective may have influenced the analysis. Ultimately an ongoing reflexive  
21 process adopted and operationalised throughout this research project aimed to limit such biases in so  
22 far as were possible. Other steps taken to mitigate potential bias included the use of published  
23 guidelines in the development and implementation of the research, acknowledgement of the positive  
24 role of the researcher's own experience of the topic and the collaboration with an experienced  
25 qualitative researcher throughout the research process.  
26  
27  
28  
29  
30  
31  
32

### 33 **Conclusion**

34 In summary, our results suggest that the structures that underpin CFR are sophisticated and the care  
35 provided is complex. This is a striking finding in the context of a voluntary and community enterprise.  
36 We offer figure 1 and its relevant sub-themes as one potential model for lay CFR care in the  
37 community. This will need to be considered and further developed by all stakeholders.  
38  
39  
40  
41  
42  
43  
44  
45  
46  
47  
48

### 49 **References**

- 50 1. Atwood C, Eisenberg MS, Herlitz J, et al. Incidence of EMS-treated out-of-hospital cardiac arrest in  
51 Europe. *Resuscitation* 2005;**67**(1):75-80.
- 52 2. Valenzuela TD, Roe DJ, Cretin S, et al. Estimating effectiveness of cardiac arrest interventions: A  
53 logistic regression survival model. *Circulation* 1997;**96**(10):3308-13.
- 54 3. Barry T, Conroy N, Masterson S, et al. Community first responders for out-of-hospital cardiac  
55 arrest (Protocol). *Cochrane Database of Systematic Reviews* 2017, Issue 8. Art. No.:  
56 CD012764. DOI: 10.1002/14651858.CD012764.
- 57 4. Hansen CM, Kragholm K, Granger CB, et al. The role of bystanders, first responders, and  
58 emergency medical service providers in timely defibrillation and related outcomes after out-of-  
59 hospital cardiac arrest: Results from a statewide registry. *Resuscitation* 2015;**96**:303-09.  
60

- 1
  - 2
  - 3
  - 4
  - 5
  - 6
  - 7
  - 8
  - 9
  - 10
  - 11
  - 12
  - 13
  - 14
  - 15
  - 16
  - 17
  - 18
  - 19
  - 20
  - 21
  - 22
  - 23
  - 24
  - 25
  - 26
  - 27
  - 28
  - 29
  - 30
  - 31
  - 32
  - 33
  - 34
  - 35
  - 36
  - 37
  - 38
  - 39
  - 40
  - 41
  - 42
  - 43
  - 44
  - 45
  - 46
  - 47
  - 48
  - 49
  - 50
  - 51
  - 52
  - 53
  - 54
  - 55
  - 56
  - 57
  - 58
  - 59
  - 60
5. Smith LM, Davidson PM, Halcomb EJ, et al. Can lay responder defibrillation programmes improve survival to hospital discharge following an out-of-hospital cardiac arrest? *Aust Crit Care* 2007;**20**(4):137-45.
6. Ringh M, Rosenqvist M, Hollenberg J, et al. Mobile-phone dispatch of laypersons for CPR in out-of-hospital cardiac arrest. *Resuscitation* 2015;**96**:2.
7. Zijlstra JA, Stieglis R, Riedijk F, et al. Local lay rescuers with AEDs, alerted by text messages, contribute to early defibrillation in a Dutch out-of-hospital cardiac arrest dispatch system. *Resuscitation* 2014;**85**(11):1444-49.
8. CSO. Census 2016 Summary Results - Part 1. Dublin: Central Statistics Office, 2017.
9. OHCAR. Out of Hospital Cardiac Arrest Register, Annual Report 2016. Galway, 2017.
10. Masterson S, Wright P, O'Donnell C, et al. Urban and rural differences in out-of-hospital cardiac arrest in Ireland. *Resuscitation* 2015;**91**:42-47.
11. Barry T, González A, Conroy N, et al. Mapping the potential of community first responders to increase cardiac arrest survival *Open Heart* 2018;**5**:e000912. doi: 10.1136/openhrt-2018-000912.
12. Robson C. *Real world research: a resource for users of social research methods in applied settings*. 3rd ed. Oxford: Wiley-Blackwell, 2011.
13. O'Brien BC, Harris IB, Beckman TJ, et al. Standards for Reporting Qualitative Research: A Synthesis of Recommendations. *Acad Med* 2014;**89**(9):1245-51.
14. Braun V, Clarke V. Using thematic analysis in psychology. *Qualitative Research in Psychology* 2006;**3**(2):77-101.
15. Braun V, Clarke V. *Successful qualitative research: a practical guide for beginners*. London: SAGE, 2013.
16. Lambiase PD. Reinforcing the Links in the Chain of Survival. *J Am Coll Cardiol* 2017;**70**(9):1118-20.
17. Pijls RW, Nelemans PJ, Rahel BM, et al. A text message alert system for trained volunteers improves out-of-hospital cardiac arrest survival. *Resuscitation* 2016;**105**:182-7.
18. Phung VH, Trueman I, Togher F, et al. Community first responders and responder schemes in the United Kingdom: systematic scoping review. *Scandinavian Journal Of Trauma Resuscitation & Emergency Medicine* 2017;**25**.
19. Phung VH, Trueman I, Togher F, et al. Perceptions and experiences of community first responders on their role and relationships: qualitative interview study. *Scandinavian Journal Of Trauma Resuscitation & Emergency Medicine* 2018;**26**.
20. Timmons S, Vernon-Evans A. Why do people volunteer for community first responder groups? *Emerg Med J* 2013;**30**(3):e13.
21. Davies E, Maybury B, Colquhoun M, et al. Public Access Defibrillation: Psychological consequences in responders. *Resuscitation* 2008;**77**(2):201-06.
22. Harrison-Paul R, Timmons S, Schalkwyk WdV. Training lay-people to use automatic external defibrillators: Are all of their needs being met? *Resuscitation* 2006;**71**(1):80-88.
23. Zijlstra JA, Beesems SG, De Haan RJ, et al. Psychological impact on dispatched local lay rescuers performing bystander cardiopulmonary resuscitation. *Resuscitation* 2015;**92**:115-21.
24. Peberdy MA, Ottingham LV, Groh WJ, et al. Adverse events associated with lay emergency response programs: the public access defibrillation trial experience. *Resuscitation* 2006;**70**(1):59-65.
25. Braun V, Clarke V. (Mis)conceptualising themes, thematic analysis, and other problems with Fugard and Potts' (2015) sample-size tool for thematic analysis. *International Journal of Social Research Methodology* 2016;**19**(6):739-43.



Figure 1

243x105mm (96 x 96 DPI)

## Standards for Reporting Qualitative Research (SRQR)\*

<http://www.equator-network.org/reporting-guidelines/srqr/>

Page/line no(s).

### Title and abstract

|                                                                                                                                                                                                                                                              |       |
|--------------------------------------------------------------------------------------------------------------------------------------------------------------------------------------------------------------------------------------------------------------|-------|
| <p><b>Title</b> - Concise description of the nature and topic of the study Identifying the study as qualitative or indicating the approach (e.g., ethnography, grounded theory) or data collection methods (e.g., interview, focus group) is recommended</p> | Pg. 1 |
| <p><b>Abstract</b> - Summary of key elements of the study using the abstract format of the intended publication; typically includes background, purpose, methods, results, and conclusions</p>                                                               | Pg. 2 |

### Introduction

|                                                                                                                                                                     |       |
|---------------------------------------------------------------------------------------------------------------------------------------------------------------------|-------|
| <p><b>Problem formulation</b> - Description and significance of the problem/phenomenon studied; review of relevant theory and empirical work; problem statement</p> | Pg. 5 |
| <p><b>Purpose or research question</b> - Purpose of the study and specific objectives or questions</p>                                                              | Pg. 2 |

### Methods

|                                                                                                                                                                                                                                                                                                                                                                                                             |       |
|-------------------------------------------------------------------------------------------------------------------------------------------------------------------------------------------------------------------------------------------------------------------------------------------------------------------------------------------------------------------------------------------------------------|-------|
| <p><b>Qualitative approach and research paradigm</b> - Qualitative approach (e.g., ethnography, grounded theory, case study, phenomenology, narrative research) and guiding theory if appropriate; identifying the research paradigm (e.g., postpositivist, constructivist/ interpretivist) is also recommended; rationale**</p>                                                                            | Pg. 6 |
| <p><b>Researcher characteristics and reflexivity</b> - Researchers' characteristics that may influence the research, including personal attributes, qualifications/experience, relationship with participants, assumptions, and/or presuppositions; potential or actual interaction between researchers' characteristics and the research questions, approach, methods, results, and/or transferability</p> | Pg. 6 |
| <p><b>Context</b> - Setting/site and salient contextual factors; rationale**</p>                                                                                                                                                                                                                                                                                                                            | Pg. 6 |
| <p><b>Sampling strategy</b> - How and why research participants, documents, or events were selected; criteria for deciding when no further sampling was necessary (e.g., sampling saturation); rationale**</p>                                                                                                                                                                                              | Pg.6  |
| <p><b>Ethical issues pertaining to human subjects</b> - Documentation of approval by an appropriate ethics review board and participant consent, or explanation for lack thereof; other confidentiality and data security issues</p>                                                                                                                                                                        | Pg. 6 |
| <p><b>Data collection methods</b> - Types of data collected; details of data collection procedures including (as appropriate) start and stop dates of data collection and analysis, iterative process, triangulation of sources/methods, and modification of procedures in response to evolving study findings; rationale**</p>                                                                             | Pg. 7 |

|                       |                                                                                                                                                                                                                                                       |        |
|-----------------------|-------------------------------------------------------------------------------------------------------------------------------------------------------------------------------------------------------------------------------------------------------|--------|
| 1<br>2<br>3<br>4<br>5 | <b>Data collection instruments and technologies</b> - Description of instruments (e.g., interview guides, questionnaires) and devices (e.g., audio recorders) used for data collection; if/how the instrument(s) changed over the course of the study | Pg. 6  |
| 6<br>7<br>8           | <b>Units of study</b> - Number and relevant characteristics of participants, documents, or events included in the study; level of participation (could be reported in results)                                                                        | Pg. 6  |
| 9<br>10<br>11<br>12   | <b>Data processing</b> - Methods for processing data prior to and during analysis, including transcription, data entry, data management and security, verification of data integrity, data coding, and anonymization/de-identification of excerpts    | Pg. 7  |
| 13<br>14<br>15<br>16  | <b>Data analysis</b> - Process by which inferences, themes, etc., were identified and developed, including the researchers involved in data analysis; usually references a specific paradigm or approach; rationale**                                 | Pg. 7  |
| 17<br>18<br>19<br>20  | <b>Techniques to enhance trustworthiness</b> - Techniques to enhance trustworthiness and credibility of data analysis (e.g., member checking, audit trail, triangulation); rationale**                                                                | Pg.6/7 |

## Results/findings

|                      |                                                                                                                                                                                                   |                 |
|----------------------|---------------------------------------------------------------------------------------------------------------------------------------------------------------------------------------------------|-----------------|
| 23<br>24<br>25<br>26 | <b>Synthesis and interpretation</b> - Main findings (e.g., interpretations, inferences, and themes); might include development of a theory or model, or integration with prior research or theory | Pg. 7-12        |
| 27<br>28<br>29       | <b>Links to empirical data</b> - Evidence (e.g., quotes, field notes, text excerpts, photographs) to substantiate analytic findings                                                               | Tables Pg. 9-13 |

## Discussion

|                                  |                                                                                                                                                                                                                                                                                                                                                                                                             |           |
|----------------------------------|-------------------------------------------------------------------------------------------------------------------------------------------------------------------------------------------------------------------------------------------------------------------------------------------------------------------------------------------------------------------------------------------------------------|-----------|
| 32<br>33<br>34<br>35<br>36<br>37 | <b>Integration with prior work, implications, transferability, and contribution(s) to the field</b> - Short summary of main findings; explanation of how findings and conclusions connect to, support, elaborate on, or challenge conclusions of earlier scholarship; discussion of scope of application/generalizability; identification of unique contribution(s) to scholarship in a discipline or field | Pg. 12/13 |
| 38<br>39                         | <b>Limitations</b> - Trustworthiness and limitations of findings                                                                                                                                                                                                                                                                                                                                            | Pg. 14    |

## Other

|                |                                                                                                                                               |          |
|----------------|-----------------------------------------------------------------------------------------------------------------------------------------------|----------|
| 42<br>43<br>44 | <b>Conflicts of interest</b> - Potential sources of influence or perceived influence on study conduct and conclusions; how these were managed | Pg. 14/3 |
| 45<br>46       | <b>Funding</b> - Sources of funding and other support; role of funders in data collection, interpretation, and reporting                      | Pg 3     |

\*The authors created the SRQR by searching the literature to identify guidelines, reporting standards, and critical appraisal criteria for qualitative research; reviewing the reference lists of retrieved sources; and contacting experts to gain feedback. The SRQR aims to improve the transparency of all aspects of qualitative research by providing clear standards for reporting qualitative research.

1  
2  
3  
4  
5  
6  
7  
8  
9  
10  
11  
12  
13  
14  
15  
16  
17  
18  
19  
20  
21  
22  
23  
24  
25  
26  
27  
28  
29  
30  
31  
32  
33  
34  
35  
36  
37  
38  
39  
40  
41  
42  
43  
44  
45  
46  
47  
48  
49  
50  
51  
52  
53  
54  
55  
56  
57  
58  
59  
60

\*\*The rationale should briefly discuss the justification for choosing that theory, approach, method, or technique rather than other options available, the assumptions and limitations implicit in those choices, and how those choices influence study conclusions and transferability. As appropriate, the rationale for several items might be discussed together.

**Reference:**

O'Brien BC, Harris IB, Beckman TJ, Reed DA, Cook DA. **Standards for reporting qualitative research: a synthesis of recommendations.** *Academic Medicine*, Vol. 89, No. 9 / Sept 2014  
DOI: 10.1097/ACM.0000000000000388

For peer review only
